# Supplementary material for: PFAS drinking water treatment trade-offs: comparing the health burden of GAC treatment to the health benefits of reduced PFAS exposure
Source: Royal Society of Chemistry journal article supplement (doi:10.1039/d5em00238a), 2025-01-01
Supplement: d5em00238a1.pdf [file d5em00238a1.pdf]

# PFAS drinking water treatment trade-offs: comparing the health burden of GAC treatment to the health benefits of reduced PFAS exposure

Sanne J. Smith<sup>1\*</sup>, Émile Sylvestre<sup>1</sup>, Anne Marieke Motelica-Wagenaar<sup>2,3</sup>, Beatrice Cantoni<sup>4</sup>, Parvathi Suresh Nair<sup>1</sup>, Mar Palmeros Parada<sup>1</sup>

<sup>1</sup>Delft University of Technology, Department of Water Management, Stevinweg 1, 2628 CN, Delft, the Netherlands.

<sup>2</sup>Waternet, Korte Ouderkerkerdijk 7, 1096 AC, Amsterdam, the Netherlands.

<sup>3</sup>Radboud University, Department of Ecology, Radboud Institute for Biological and Environmental Sciences, Heyendaalseweg 135, 6525 AJ Nijmegen, the Netherlands.

<sup>4</sup>Politecnico Milano, Department of Civil and Environmental Engineering (DICA) - Environmental Section, Piazza Leonardo da Vinci 32, 20133 Milano, Italy

*SI Table 1: Full names and relative potency factors (RPF) of PFAS included in the calculation of PFOA-equivalent (PEQ) concentrations.<sup>1,2</sup> Compounds indicated with an \* are included in the EFSA-4 tolerable weekly intake.*

| Abbreviation | Full name                            | Relative potency factor (RPF) |
|--------------|--------------------------------------|-------------------------------|
| PFOA*        | Perfluorooctanoic acid               | 1                             |
| PFOS*        | Perfluorooctane sulfonic acid        | 2                             |
| PFNA*        | Perfluorononanoic acid               | 10                            |
| PFHxS*       | Perfluorohexane sulfonic acid        | 0.6                           |
| PFBA         | Perfluorobutanoic acid               | 0.05                          |
| PFPeA        | Perfluoropentanoic acid              | 0.05                          |
| PFHxA        | Perfluorohexanoic acid               | 0.01                          |
| PFHpA        | Perfluoroheptanoic acid              | 1                             |
| PFDA         | Perfluorodecanoic acid               | 10                            |
| PFUnDA       | Perfluoroundecanoic acid             | 4                             |
| PFDoDA       | Perfluorododecanoic acid             | 4                             |
| PFTTrDA      | Perfluorotridecanoic acid            | 3                             |
| PFTeDA       | Perfluorotetradecanoic acid          | 0.3                           |
| PFHxDA       | Perfluorohexadecanoic acid           | 0.02                          |
| PFODA        | Perfluorooctadecanoic acid           | 0.02                          |
| PFBS         | Perfluorobutane sulfonic acid        | 0.001                         |
| PFPeS        | Perfluoropentane sulfonic acid       | 0.6                           |
| PFHpS        | Perfluoroheptane sulfonic acid       | 2                             |
| PFDS         | Perfluorodecane sulfonic acid        | 2                             |
| HFPO-DA      | Hexafluoropropylene oxide dimer acid | 0.06                          |
| DONA         | 4,8-Dioxa-3H-perfluorononanoic acid  | 0.03                          |
| 6:2 FTOH     | 6:2 fluorotelomer alcohol            | 0.02                          |
| 8:2 FTOH     | 8:2 fluorotelomer alcohol            | 0.04                          |

Concentrations in PEQ are calculated by summing the concentrations of individual PFAS multiplied with their RPF. For example, a water sample that contains 1 ng/L of each of the EFSA<sub>4</sub> compounds will have a PEQ concentration of 1·1 (PFOA) + 1·2 (PFOS) + 1·10 (PFNA) + 1·0.6 (PFHxS) = 13.6 ng PEQ/L.

## Supplementary Information

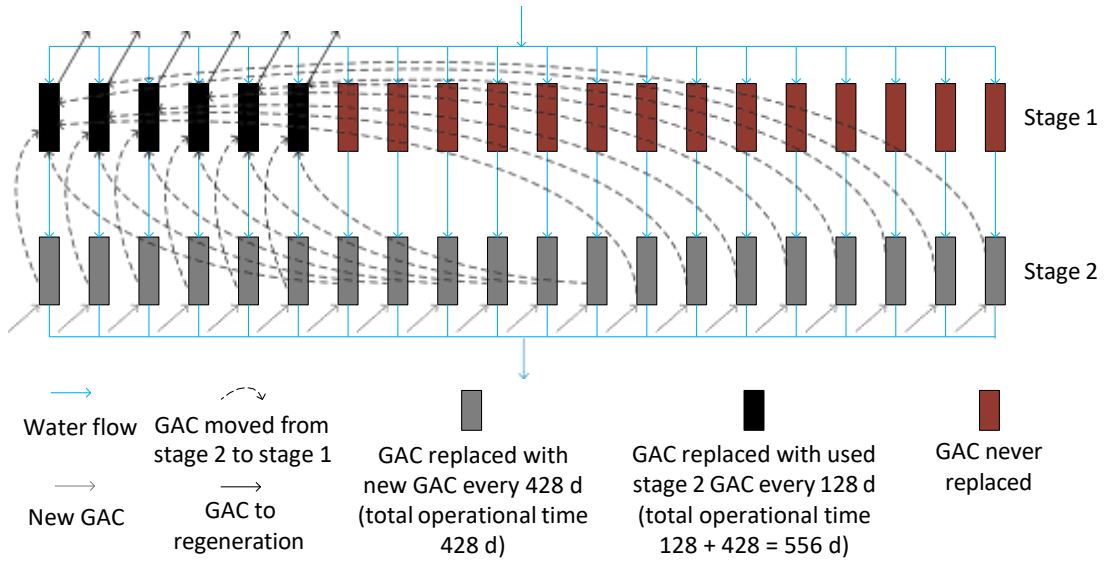

SI Figure 1: Overview of GAC treatment process at the Leiduín drinking water treatment site from Waternet. Operational times shown are calculated based on the average reactivation frequency in 2024.

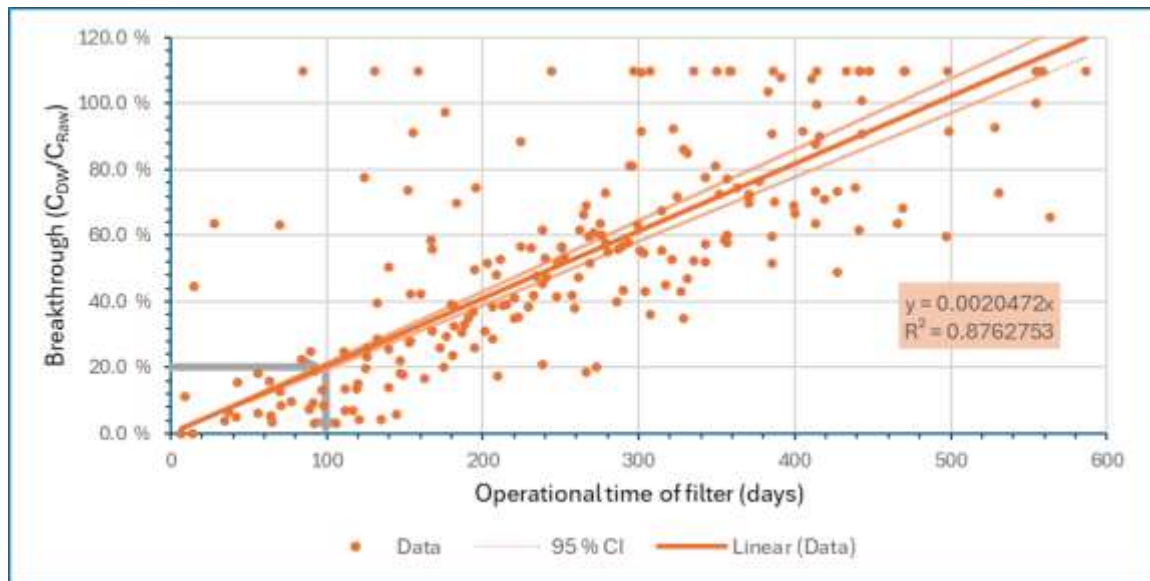

SI Figure 2: Breakthrough of PEQ, from raw water ( $C_{RAW}$ ) to drinking water ( $C_{DW}$ ) versus operational time of GAC filters, fit to a linear regression model. Note that the operational time used to determine the required reactivation frequency was twice the operational time found from the fitted equation: since multiple GAC filters are operated in parallel, this ensures that the average operational time over all filters is equal to the determined maximum.

## Supplementary Information

*SI Table 2: Inventory for Water Treatment Process (GAC focus) - Single Use Coal and Wood GAC*

| Inputs                 | Amounts                                              | Unit           | Comments                                                                                                                                                                                                            |
|------------------------|------------------------------------------------------|----------------|---------------------------------------------------------------------------------------------------------------------------------------------------------------------------------------------------------------------|
| GAC:                   | (a) 931;<br>(b) 2002;<br>(c) 1774;<br>(d) 2298       |                | <u>Coal-based GAC</u> : Ecoinvent dataset 'Activated carbon, granular {RER}  activated carbon production, granular from hard coal   Cut-off, U'<br><u>Wood-based GAC</u> : Project data, as in SI table 6.          |
| Tap Water              | 70726271                                             | m <sup>3</sup> | Tap water {Europe without Switzerland}  market for   Cut-off, U                                                                                                                                                     |
| Electricity            | 3823756                                              | kWh            | Electricity, medium voltage {NL}  market for   Cut-off, U. Estimation of WTP use data for GAC treatment.                                                                                                            |
| Transport of Wood-GAC  | (a) 32585;<br>(b) 70070;<br>(c) 62074;<br>(d) 80430  | tkm            | Transport, freight, lorry 16-32 metric ton, euro6 {RER}  market for transport, freight, lorry 16-32 metric ton, EURO6   Cut-off, U. Distance of transport from GAC Activation to WTP – 35km.                        |
| Transport of Spent GAC | (a) 23250;<br>(b) 50050;<br>(c) 44350;<br>(d) 57450  | tkm            | Transport, freight, lorry 16-32 metric ton, euro6 {RER}  market for transport, freight, lorry 16-32 metric ton, EURO6   Cut-off, U. Spent GAC to Incineration plant - 20 km.                                        |
| <b>Output</b>          |                                                      |                |                                                                                                                                                                                                                     |
| Drinking water         | 70653937                                             | m <sup>3</sup> | Project defined, WTP data                                                                                                                                                                                           |
| <b>Waste</b>           |                                                      |                |                                                                                                                                                                                                                     |
| Spent WoodGAC, wet     | (a) 1163.75;<br>(b) 2502.5;<br>(c) 2217;<br>(d) 2873 | ton            | Hazardous waste, for incineration {Europe without Switzerland}  market for hazardous waste, for incineration   Cut-off, U, as in Ellis et al. 2023. Spent GAC is assumed to contain 25% moisture as in Vilen, 2022. |

- (a) 2024 GAC requirements
- (b) average estimated GAC requirements
- (c) minimum estimated GAC requirements
- (d) maximum estimated GAC requirements

## Supplementary Information

*SI Table 3: Inventory for Water Treatment Process (GAC focus) - Reactivated Coal and Wood GAC .*

| Inputs          | Amounts                                                | Unit           | Comments                                                                                                                                                                                                                                                                      |
|-----------------|--------------------------------------------------------|----------------|-------------------------------------------------------------------------------------------------------------------------------------------------------------------------------------------------------------------------------------------------------------------------------|
| Virgin GAC      | (a) 116.4<br>(b) 250.3<br>(c) 221.7<br>(d) 287.3       | ton            | <u>Coal-based GAC</u> : Ecoinvent dataset 'Activated carbon, granular {RER}  activated carbon production, granular from hard coal   Cut-off, U'<br><u>Wood-based GAC</u> : Project defined, as in table SI 6.                                                                 |
| Reactivated GAC | (a) 814.6;<br>(b) 1751.8;<br>(c) 1551.9;<br>(d) 2010.8 | ton            | <u>Coal-based GAC</u> : Project defined, based on ecoinvent dataset 'Activated carbon, granular {RER}  treatment of spent activated carbon, granular from hard coal, reactivation   Cut-off, U'<br><u>Wood-based GAC</u> : Project defined, as in SI 7.                       |
| Tap Water       | 70726271                                               | m <sup>3</sup> | Tap water {Europe without Switzerland}  market for   Cut-off, U                                                                                                                                                                                                               |
| Electricity     | 3823756                                                | kWh            | Electricity, medium voltage {NL}  market for   Cut-off, U                                                                                                                                                                                                                     |
| Transport       | (a) 32585;<br>(b) 70074;<br>(c) 62076;<br>(d) 80434    | tkm            | Sum of transport need for virgin and reactivated GAC. Transport, freight, lorry 16-32 metric ton, euro6 {RER}  market for transport, freight, lorry 16-32 metric ton, EURO6   Cut-off, U. Distance of transport from GAC (re)activation to WTP – 35km.                        |
| Outputs         | Amounts                                                | Unit           | Database process                                                                                                                                                                                                                                                              |
| Drinking water  | 70653937                                               | m <sup>3</sup> | Project defined                                                                                                                                                                                                                                                               |
| Spent GAC       | (a) 1164;<br>(b) 2503<br>(c) 2217;<br>(d) 2873;        | ton            | Accounted as wet GAC, 25% moisture.<br><u>Coal-based GAC</u> : 'Activated carbon, granular {RER}  treatment of spent activated carbon, granular from hard coal, reactivation   Cut-off, U'<br><u>Wood-based GAC</u> : Project defined, as input for reactivation, as in SI 7, |

(a) 2024 GAC requirements

(b) average estimated GAC requirements

(c) maximum estimated GAC requirements

(d) minimum estimated GAC requirements

## Supplementary Information

SI Table 4: Inventory for Wood GAC Production Process

| Inputs               | Amounts     | Unit | Comments                                                                                                                                                                                                                                               |
|----------------------|-------------|------|--------------------------------------------------------------------------------------------------------------------------------------------------------------------------------------------------------------------------------------------------------|
| Wood chips           | 8,44        | kg   | Bark chips, wet, measured as dry mass {GLO}  market for   Cut-off, U.                                                                                                                                                                                  |
| Electricity          | 1,7         | kWh  | Medium voltage, NL. Amount based on Vilen, 2022.                                                                                                                                                                                                       |
| Nitrogen             | 0,15        | kg   | Nitrogen, liquid {RER}  market for   Cut-off, U. Amount based on Vilen, 2022 <sup>31</sup>                                                                                                                                                             |
| Tap water            | 2,11        | kg   | Tap water {Europe without Switzerland}  market for   Cut-off, S. Amount based on Vilen, 2022. <sup>31</sup>                                                                                                                                            |
| Transport            |             |      |                                                                                                                                                                                                                                                        |
| Truck                | 0,422       | tkm  | Transport, freight, lorry 16-32 metric ton, euro6 {RER}  market for transport, freight, lorry 16-32 metric ton, EURO6   Cut-off, U. Transport of wood chips to GAC production only, with an assumed distance of 50km, as in Vilen, 2022. <sup>31</sup> |
| Outputs              |             |      |                                                                                                                                                                                                                                                        |
| Wood-based GAC       | 1           | kg   | Project defined stream.                                                                                                                                                                                                                                |
| Emissions            |             |      |                                                                                                                                                                                                                                                        |
| Activation           |             |      |                                                                                                                                                                                                                                                        |
| CO2                  | 1,81E+00    | kg   | Based on Gu et al, 2018 <sup>32</sup> (originally per kg biochar feedstock, converted based on 2,11 kg wood biochar / kg wood-based GAC).                                                                                                              |
| H2O                  | 9,07E-02    | kg   |                                                                                                                                                                                                                                                        |
| N2                   | 1,83E+00    | kg   |                                                                                                                                                                                                                                                        |
| O2                   | 1,59E+00    | kg   |                                                                                                                                                                                                                                                        |
| H2                   | 4,22E-03    | kg   |                                                                                                                                                                                                                                                        |
| CO                   | 8,86E-03    | kg   |                                                                                                                                                                                                                                                        |
| CH4                  | 8,44E-04    | kg   |                                                                                                                                                                                                                                                        |
| SO2                  | 1,27E-03    | kg   |                                                                                                                                                                                                                                                        |
| HCl                  | 1,39E-06    | kg   |                                                                                                                                                                                                                                                        |
| Nox                  | 8,84E-05    | kg   |                                                                                                                                                                                                                                                        |
| N2O                  | 1,39E-06    | kg   |                                                                                                                                                                                                                                                        |
| Acetaldehyde         | 1,16E-05    | kg   |                                                                                                                                                                                                                                                        |
| Benzene              | 8,36E-05    | kg   |                                                                                                                                                                                                                                                        |
| Formaldehyde         | 4,64E-08    | kg   |                                                                                                                                                                                                                                                        |
| Methanol             | 4,64E-06    | kg   |                                                                                                                                                                                                                                                        |
| Naphthalene          | 9,31E-06    | kg   |                                                                                                                                                                                                                                                        |
| Phenol               | 2,04E-06    | kg   |                                                                                                                                                                                                                                                        |
| Propanal             | 9,31E-08    | kg   |                                                                                                                                                                                                                                                        |
| Particulates         | 4,62E-02    | kg   |                                                                                                                                                                                                                                                        |
| Carbonization        |             |      |                                                                                                                                                                                                                                                        |
| Acetaldehyde         | 9,65029E-06 | kg   | Taking emissions to air from ecoinvent dataset "wood pellets, burned in stirling heat and power co-generation unit, 3kW electric", with methane, carbon dioxide and carbon monoxide reduced by 43% as in Vilen, 2022 11 as described in main text.     |
| Ammonia              | 0,000273688 | kg   |                                                                                                                                                                                                                                                        |
| Arsenic              | 1,58201E-07 | kg   |                                                                                                                                                                                                                                                        |
| Benzene              | 0,000143963 | kg   |                                                                                                                                                                                                                                                        |
| Benzene, ethyl-      | 4,74604E-06 | kg   |                                                                                                                                                                                                                                                        |
| Benzene, hexachloro- | 1,13905E-12 | kg   |                                                                                                                                                                                                                                                        |
| Benzo(a)pyrene       | 7,91007E-08 | kg   |                                                                                                                                                                                                                                                        |

Supplementary Information

|                                                                   |             |    |
|-------------------------------------------------------------------|-------------|----|
| Bromine                                                           | 9,49209E-06 | kg |
| Cadmium                                                           | 1,10741E-07 | kg |
| Calcium                                                           | 0,000925478 | kg |
| Carbon dioxide, biogenic                                          | 8,711158032 | kg |
| Carbon monoxide, biogenic                                         | 0,002885594 | kg |
| Chlorine                                                          | 2,84763E-05 | kg |
| Chromium                                                          | 6,26478E-07 | kg |
| Chromium VI                                                       | 6,32806E-09 | kg |
| Copper                                                            | 3,48043E-06 | kg |
| Dinitrogen monoxide                                               | 0,000474604 | kg |
| Dioxin, 2,3,7,8 Tetrachlorodibenzo-p-                             | 4,90424E-12 | kg |
| Fluorine                                                          | 7,91007E-06 | kg |
| Formaldehyde                                                      | 2,05662E-05 | kg |
| Hydrocarbons, aliphatic, alkanes, unspecified                     | 0,000143963 | kg |
| Hydrocarbons, aliphatic, unsaturated                              | 0,000490424 | kg |
| Lead                                                              | 3,95504E-06 | kg |
| Magnesium                                                         | 5,69525E-05 | kg |
| Manganese                                                         | 2,68942E-05 | kg |
| Mercury                                                           | 4,74604E-08 | kg |
| Methane, biogenic                                                 | 3,60699E-05 | kg |
| m-Xylene                                                          | 1,89842E-05 | kg |
| Nickel                                                            | 9,49209E-07 | kg |
| Nitrogen oxides                                                   | 0,011074101 | kg |
| NMVOC, non-methane volatile organic compounds, unspecified origin | 0,000363863 | kg |
| PAH, polycyclic aromatic hydrocarbons                             | 1,75604E-06 | kg |
| Particulates, < 2.5 um                                            | 0,001582014 | kg |
| Phenol, pentachloro-                                              | 1,28143E-09 | kg |
| Phosphorus                                                        | 4,74604E-05 | kg |
| Potassium                                                         | 0,003701914 | kg |
| Sodium                                                            | 0,000205662 | kg |
| Sulfur dioxide                                                    | 0,000395504 | kg |
| Toluene                                                           | 4,74604E-05 | kg |
| Zinc                                                              | 4,74604E-05 | kg |

## Supplementary Information

*SI Table 5: Inventory for Reactivated Wood GAC Production Process*

| <b>Inputs</b>        | <b>Amounts</b> | <b>Unit</b> | <b>Comments</b>                                                                                                                                                                                            |
|----------------------|----------------|-------------|------------------------------------------------------------------------------------------------------------------------------------------------------------------------------------------------------------|
| Spent GAC            | 1,00           | kg          | Wet, as output from drinking water process                                                                                                                                                                 |
| Electricity          | 0,41           | kWh         | Medium voltage, NL                                                                                                                                                                                         |
| Nitrogen             | 0,04           | kg          | Liquid, RER                                                                                                                                                                                                |
| Tap water            | 0,55           | kg          | Europe without Switzerland                                                                                                                                                                                 |
| <i>Transport</i>     |                |             |                                                                                                                                                                                                            |
| Truck                | 0,03           | tkm         | Transport, freight, lorry 16—32 t, RER. Same transport mode as Wood-GAC. Distance: 30km for return of spent GAC to Norit Activated Carbon for reactivation.                                                |
|                      |                |             |                                                                                                                                                                                                            |
| <b>Outputs</b>       |                |             |                                                                                                                                                                                                            |
| Reactivated Wood GAG | 0,89           | kg          | 1 enters, losses are 12,5% on final prod.                                                                                                                                                                  |
| <b>Emissions</b>     |                |             |                                                                                                                                                                                                            |
| CO <sub>2</sub>      | 1,81E+00       | kg          | Based on activation of biochar as in Gu et al, 2018 (originally per kg biochar feedstock, converted based on 2,11 kg wood biochar / kg wood-based GAC). Biogenic CO, CO <sub>2</sub> and CH <sub>4</sub> . |
| H <sub>2</sub> O     | 9,07E-02       | kg          |                                                                                                                                                                                                            |
| N <sub>2</sub>       | 1,83E+00       | kg          |                                                                                                                                                                                                            |
| O <sub>2</sub>       | 1,59E+00       | kg          |                                                                                                                                                                                                            |
| H <sub>2</sub>       | 4,22E-03       | kg          |                                                                                                                                                                                                            |
| CO                   | 8,86E-03       | kg          |                                                                                                                                                                                                            |
| CH <sub>4</sub>      | 8,44E-04       | kg          |                                                                                                                                                                                                            |
| SO <sub>2</sub>      | 1,27E-03       | kg          |                                                                                                                                                                                                            |
| HCl                  | 1,39E-06       | kg          |                                                                                                                                                                                                            |
| Nox                  | 8,84E-05       | kg          |                                                                                                                                                                                                            |
| N <sub>2</sub> O     | 1,39E-06       | kg          |                                                                                                                                                                                                            |
| Acetaldehyde         | 1,16E-05       | kg          |                                                                                                                                                                                                            |
| Benzene              | 8,36E-05       | kg          |                                                                                                                                                                                                            |
| Formaldehyde         | 4,64E-08       | kg          |                                                                                                                                                                                                            |
| Methanol             | 4,64E-06       | kg          |                                                                                                                                                                                                            |
| Naphthalene          | 9,31E-06       | kg          |                                                                                                                                                                                                            |
| Phenol               | 2,04E-06       | kg          |                                                                                                                                                                                                            |
| Propanal             | 9,31E-08       | kg          |                                                                                                                                                                                                            |
| Particulates         | 4,62E-02       | kg          |                                                                                                                                                                                                            |

## Supplementary Information

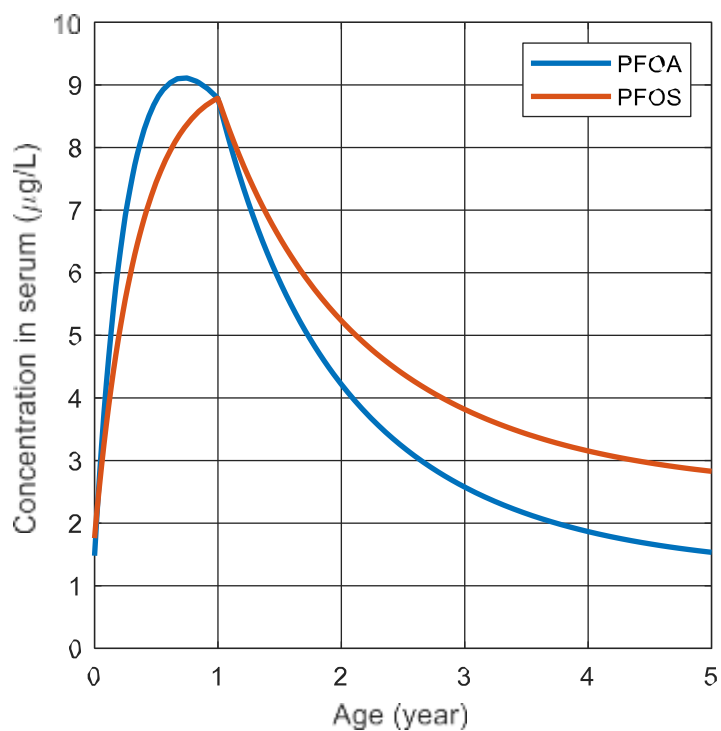

SI Figure 3: Verification that MATLAB PBPK model is an accurate reproduction of EFSA's model: PFOA and PFOS serum concentrations until age 5 using the same parameters as in EFSA's original model, to compare with Figure M.1 (page 379; PFOA) and Figure M.3 (page 382, PFOS) from Schrenk et al., 2020.<sup>3</sup>

SI Table 6: Overview of data used in DALY calculation

| Endpoint          | Population    | P (per 10 <sup>6</sup> people) <sup>4</sup> | W (DALYs/case)      | I (cases/person/year) |
|-------------------|---------------|---------------------------------------------|---------------------|-----------------------|
| Kidney cancer     | Adults >20    | 792,000                                     | 9.1 <sup>5</sup>    | 0.000194 <sup>6</sup> |
| Testicular cancer | Males >18     | 403,000                                     | 1.8 <sup>7</sup>    | 0.000064 <sup>6</sup> |
| Hypothyroidism    | Females 18-49 | 200,000                                     | 0.19 <sup>8,9</sup> | 0.002 <sup>10</sup>   |
| Hypertension      | Adults > 20   | 792,000                                     | 0.12 <sup>11</sup>  | 0.008 <sup>10</sup>   |



## Supplementary Information

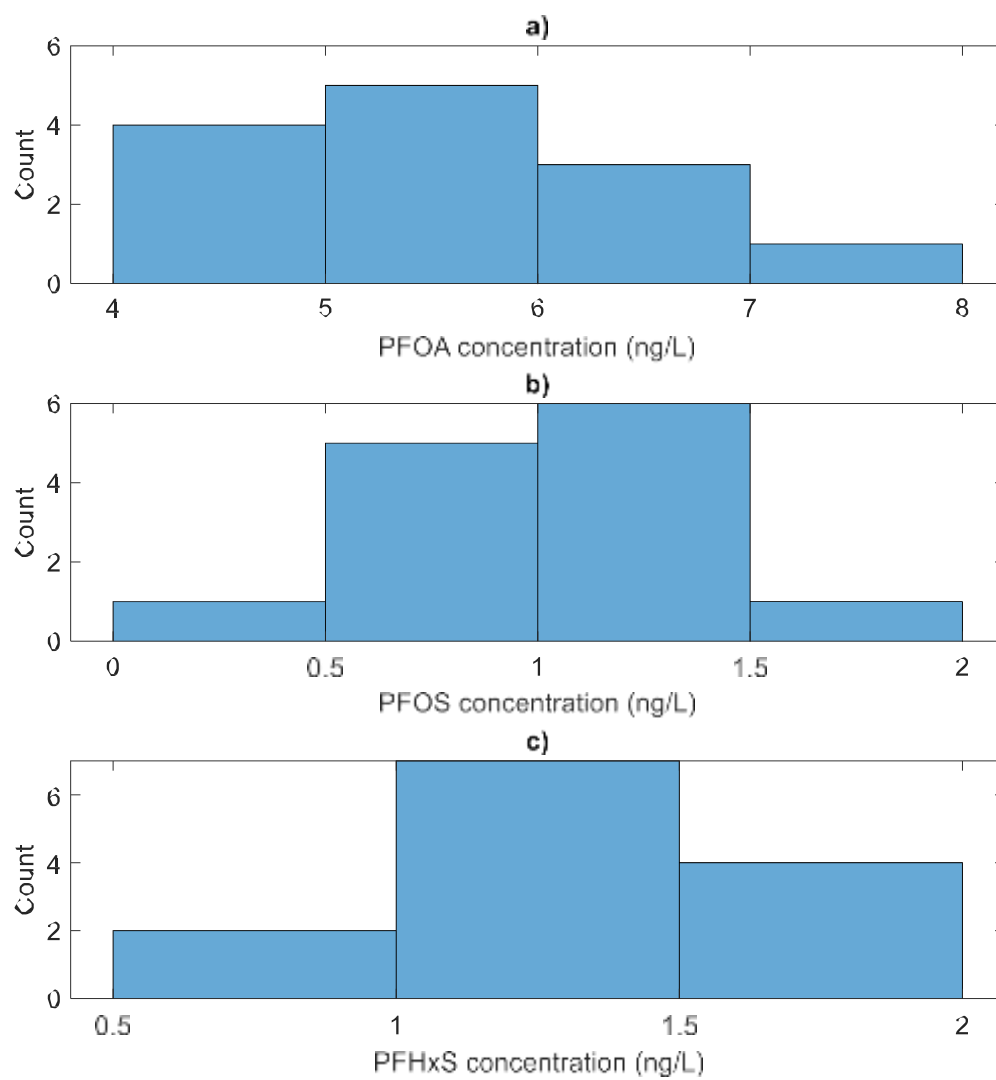

SI Figure 4: Distribution of 2024 drinking water concentrations of a) PFOA, b) PFOS and c) PFHxS. Total  $n = 13$  for all.

## Supplementary Information

SI Table 7: Health impacts (DALYs/10<sup>6</sup> p/year) from GAC treatment for each scenario, excluding DALYs related to water consumption. 2024 = reactivation frequency as in 2024 (current); Prosp. = prospective reactivation frequency

| GAC type                          | Single use wood |            | Single use coal |            | Reactivated coal |           | Reactivated wood |           |
|-----------------------------------|-----------------|------------|-----------------|------------|------------------|-----------|------------------|-----------|
| Scenario                          | 2024            | Prosp.     | 2024            | Prosp.     | 2024             | Prosp.    | 2024             | Prosp.    |
| Global warming                    | 29              | 33         | 34              | 45         | 26               | 28        | 25               | 26        |
| Fine particulate matter formation | 31              | 38         | 37              | 50         | 29               | 31        | 28               | 29        |
| Human carcinogenic toxicity       | 29              | 30         | 30              | 32         | 28               | 28        | 28               | 28        |
| Human non-carcinogenic toxicity   | 8.7             | 9.1        | 10              | 13         | 8.3              | 8.7       | 8.0              | 8.1       |
| <b>Total</b>                      | <b>98</b>       | <b>110</b> | <b>110</b>      | <b>140</b> | <b>92</b>        | <b>96</b> | <b>89</b>        | <b>90</b> |

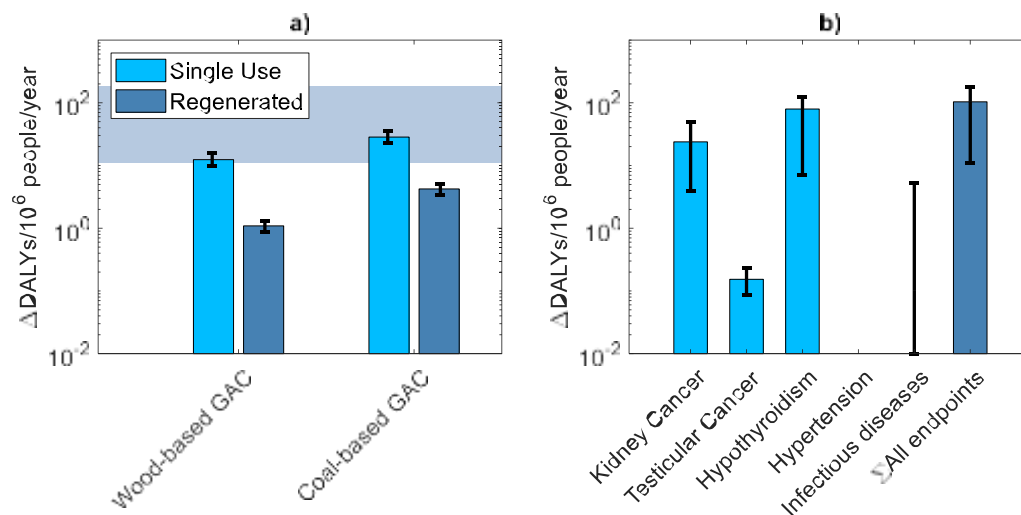

SI Figure 5: Repeated version of main text Figure 3, but with the dietary exposure set to the lower limit of the most recently estimated exposure of the Dutch population.

## Supplementary Information

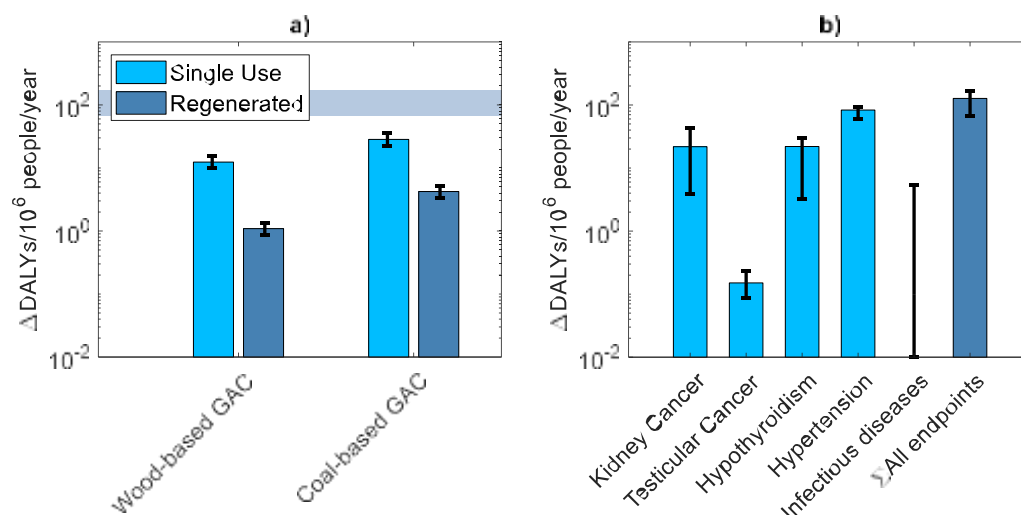

SI Figure 6: Repeated version of main text Figure 3, but with the dietary exposure set to the upper limit of the most recently estimated exposure of the Dutch population.

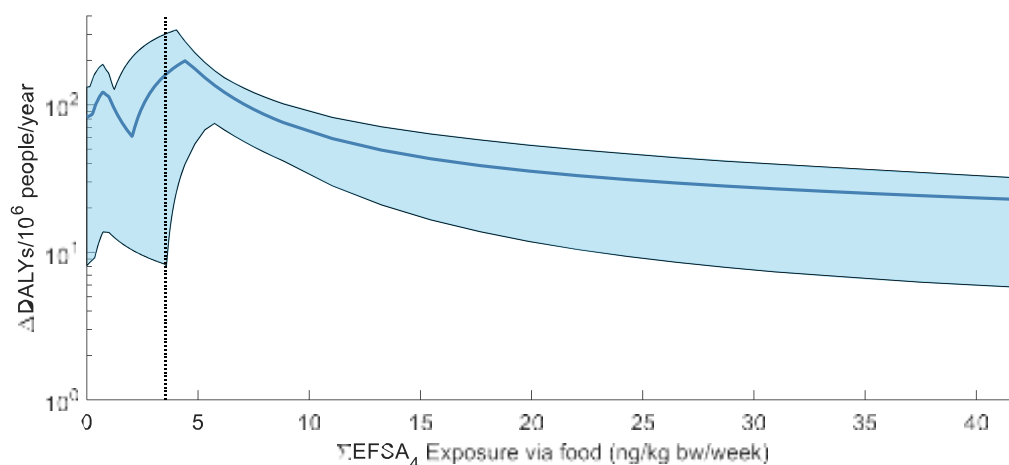

SI Figure 7: Sensitivity analysis over the effect of food exposure on the  $\Delta$ DALYs between the scenario's with current and targeted drinking water concentrations. The blue line represents the best estimate, and the shaded region the uncertainty range (min-max, derived from 95 % CI over current drinking water concentrations and ERRs). The dotted vertical line is the food exposure at 80 % of the EFSA recommendation. Note that, in the dietary exposure, the ratio between PFOA/PFNA:PFOS/PFHxS is kept constant at the ratio assumed by EFSA (1:2.4).

SI Table 8: Serum/plasma concentrations at age 3 months in exclusively breastfed infants, comparison between measured and modelled results. The EFSA PBPK model assumes exclusive breastfeeding, as a worst-case scenario, so comparisons against plasma levels in breastfed infants are most realistic. Ranges represent the uncertainty from variation in current drinking water concentrations.

|                            | Measured concentrations                                     | Modelled serum concentrations; current scenario |                                     |                                     |
|----------------------------|-------------------------------------------------------------|-------------------------------------------------|-------------------------------------|-------------------------------------|
|                            | Plasma conc. in exclusively breastfed infants <sup>12</sup> | EFSA food exposure <sup>3</sup>                 | LB food exposure 2022 <sup>13</sup> | UB food exposure 2022 <sup>13</sup> |
| PFOA/PFNA                  | 4.04                                                        | 11.7 (11.1-12.3)                                | 6.1 (5.5-7.1)                       | 16.4 (15.8-17.1)                    |
| PFOS/PFHxS                 | 3.14                                                        | 5.5 (5.3-5.8)                                   | 1.7 (1.5-1.8)                       | 2.2 (2.1-2.4)                       |
| $\Sigma$ EFSA <sub>4</sub> | 7.18                                                        | 17.2 (16.4-18.1)                                | 7.8 (7.0-8.9)                       | 18.6 (17.9-19.5)                    |

# Supplementary Information

SI Table 9: Plasma concentrations (ng/mL) at different ages for the different exposure scenario's. EFSA TDI: the tolerably daily intake of 0.63 ng/kg bw/d as calculated by EFSA; 2022 LB: the lower bound dietary exposure calculated by the RIVM for the Dutch population in 2022; 2022 UB: idem, but the upper bound.<sup>13</sup>

| Exposure via food as:                         | 80 % of EFSA TDI |                                  | 2022 LB        | 2022 UB          | 80 % of EFSA TDI  | 2022 LB | 2022 UB |
|-----------------------------------------------|------------------|----------------------------------|----------------|------------------|-------------------|---------|---------|
| Drink. water scenario                         | EFSA TDI         | Current DW conc.; mean (95 % CI) |                |                  | Targeted DW conc. |         |         |
| Blood plasma concentrations at birth (ng/mL)  |                  |                                  |                |                  |                   |         |         |
| PFOA/<br>PFNA                                 | 1.5              | 2.4 (2.3-2.6)                    | 1.3 (1.1-1.5)  | 3.4 (3.3-3.5)    | 1.6               | 0.5     | 2.6     |
| PFOS/<br>PFHxS                                | 1.8              | 1.7 (1.6-1.8)                    | 0.5 (0.5-0.6)  | 0.7 (0.6-0.7)    | 1.5               | 0.3     | 0.5     |
| ΣEFSA <sub>4</sub>                            | 3.3              | 4.1 (3.9-4.4)                    | 1.8 (1.6-2.1)  | 4.1 (3.9-4.2)    | 3.1               | 0.8     | 3.1     |
| Blood plasma concentrations at age 1 (ng/mL)  |                  |                                  |                |                  |                   |         |         |
| PFOA/<br>PFNA                                 | 8.7              | 14.2 (13.5-14.9)                 | 7.4 (6.7-8.7)  | 20.0 (19.2-20.7) | 9.4               | 2.7     | 15.2    |
| PFOS/<br>PFHxS                                | 8.7              | 8.3 (8.1-8.7)                    | 2.5 (2.3-2.7)  | 3.4 (3.1-3.6)    | 7.3               | 1.6     | 2.4     |
| ΣEFSA <sub>4</sub>                            | 17.4             | 22.5 (21.6-23.6)                 | 9.9 (9.0-10.4) | 23.4 (22.3-24.3) | 16.7              | 4.3     | 17.6    |
| Blood plasma concentrations at age 35 (ng/mL) |                  |                                  |                |                  |                   |         |         |
| PFOA/<br>PFNA                                 | 2.0              | 3.3 (3.1-3.4)                    | 1.7 (1.5-1.9)  | 4.6 (4.4-4.8)    | 2.2               | 0.6     | 3.5     |
| PFOS/<br>PFHxS                                | 4.9              | 4.7 (4.5-4.8)                    | 1.4 (1.3-1.5)  | 1.9 (1.8-2.0)    | 4.1               | 0.9     | 1.3     |
| ΣEFSA <sub>4</sub>                            | 6.9              | 8.0 (7.6-8.2)                    | 3.1 (2.9-3.4)  | 6.5 (6.2-6.8)    | 6.3               | 1.5     | 4.8     |

## Supplementary Information

SI Table 10: Identified uncertainties per uncertainty type. Green highlight indicates the uncertainty was discussed in the main text.

| Indeterminate                                                                                                                     | Epistemic                                                                                         | Ambiguity                                                                                                                                 |
|-----------------------------------------------------------------------------------------------------------------------------------|---------------------------------------------------------------------------------------------------|-------------------------------------------------------------------------------------------------------------------------------------------|
| Future PFAS concentrations in raw water                                                                                           | PFAS breakthrough with different types of GAC and raw water                                       | Endpoints to consider in estimation of health benefits of lower PFAS exposure                                                             |
| Future PFAS regulations                                                                                                           | Dose response relationships and DALY weights to relate PFAS serum concentration to health impacts | PFAS molecules to consider and how to account for the impact of the different PFAS molecules (e.g. equipotency, relative potency factors) |
| Type of treatment used (e.g. GAC, ion exchange, etc) and specific life cycle implications (e.g. transportation, waste management) | Concentrations of PFAS below the limit of quantification                                          | LCA assessment method assumptions (e.g. time horizon of climate change impacts, climate change impacts on human health)                   |
| Future dietary exposure to PFAS and distribution across population                                                                | Inventory data for GAC production and reactivation, especially for wood GAC at commercial scale.  | How to account for localization of health impact (e.g. local benefit from decreased PFAS exposure, global loss from global warming)       |
|                                                                                                                                   | Current dietary exposure to PFAS and distribution across population                               |                                                                                                                                           |

## References

- 1 RIVM, *Werkwijze toetsing PFAS in drinkwatermonsters*, 2023.
- 2 W. Bil, M. Zeilmaker, S. Fragki, J. Lijzen, E. Verbruggen and B. Bokkers, Risk Assessment of Per- and Polyfluoroalkyl Substance Mixtures: A Relative Potency Factor Approach, *Environ Toxicol Chem*, 2021, **40**, 859–870.
- 3 D. Schrenk, M. Bignami, L. Bodin, J. K. Chipman, J. del Mazo, B. Grasl-Kraupp, C. Hogstrand, L. Hoogenboom, J. C. Leblanc, C. S. Nebbia, E. Nielsen, E. Ntzani, A. Petersen, S. Sand, C. Vleminckx, H. Wallace, L. Barregård, S. Ceccatelli, J. P. Cravedi, T. I. Halldorsson, L. S. Haug, N. Johansson, H. K. Knutsen, M. Rose, A. C. Roudot, H. Van Loveren, G. Vollmer, K. Mackay, F. Riolo and T. Schwerdtle, Risk to human health related to the presence of perfluoroalkyl substances in food, *EFSA Journal*, DOI:10.2903/j.efsa.2020.6223.

- 4 Centraal Bureau voor de Statistiek, Bevolkingspiramide, <https://www.cbs.nl/nl-nl/visualisaties/dashboard-bevolking/bevolkingspiramide>, (accessed 7 November 2024).
- 5 S. Safiri, A.-A. Kolahi, M. A. Mansournia, A. Almasi-Hashiani, A. Ashrafi-Asgarabad, M. J. M. Sullman, D. Bettampadi, M. Qorbani, M. Moradi-Lakeh, M. Ardalan, A. Mokdad and C. Fitzmaurice, The burden of kidney cancer and its attributable risk factors in 195 countries and territories, 1990–2017, *Sci Rep*, 2020, **10**, 13862.
- 6 Integraal kankercentrum Nederland, NKR Cijfers Incidentie per jaar, <https://nkr-cijfers.iknl.nl>, (accessed 7 November 2024).
- 7 F. Pishgar, A. Haj-Mirzaian, H. Ebrahimi, S. Saeedi Moghaddam, B. Mohajer, M. R. Nowroozi, M. Ayati, F. Farzadfar, C. Fitzmaurice and E. Amini, Global, regional and national burden of testicular cancer, 1990–2016: results from the Global Burden of Disease Study 2016, *BJU Int*, 2019, **124**, 386–394.
- 8 World Health Organization, *WHO methods and data sources for global burden of disease estimates 2000-2019*, 2020.
- 9 V. Obsekov, L. G. Kahn and L. Trasande, Leveraging Systematic Reviews to Explore Disease Burden and Costs of Per- and Polyfluoroalkyl Substance Exposures in the United States, *Expo Health*, 2023, **15**, 373–394.
- 10 J. Vanhommerig and L. Overbeek, Nivel-cijfers Ziekten op jaarbasis in Nederland - incidentie en prevalentie. prevalentie, <https://www.nivel.nl/nl/zorg-en-ziekte-in-cijfers/cijfers-ziekten-op-jaarbasis>, (accessed 7 November 2024).
- 11 D. Plass, S. Kienzler, J. Bessems, J. Buekers, J. Cops, A. Purece, A. Beloconi, P. Vounatsou and K. Widmer, *Estimating the burden of disease due to lead, PFAS, phthalates, cadmium, pyrethroids and bisphenol A using HBM4EU data – test of feasibility and first results for selected countries*, 2023.
- 12 I. A. L. P. van Beijsterveldt, B. D. van Zelst, S. A. A. van den Berg, K. S. de Fluiter, M. van der Steen and A. C. S. Hokken-Koelega, Longitudinal poly- and perfluoroalkyl substances (PFAS) levels in Dutch infants, *Environ Int*, 2022, **160**, 107068.
- 13 RIVM, *Risk assessment of exposure to PFAS through food and drinking water in the Netherlands*, 2023.
