# Supplementary material for: PFAS drinking water treatment trade-offs: comparing the health burden of GAC treatment to the health benefits of reduced PFAS exposure
Source: Royal Society of Chemistry journal article supplement (doi:10.1039/d5em00238a), 2025-01-01
Supplement: d5em00238a2.xlsx [file d5em00238a2.xlsx]

## Sheet: Overview Data for models
LCA over GAC treatment								Health-effects of PFAS model
Regeneration frequency required to meet 4.4 ng PEQ/L guideline								Current drinking water concentrations					prospective drinking water concentrations
Based on 2024 data	time to regeneration (days)	regeneration frequency (/year)					Based on 2024 data	PFOA	PFNA	PFOS	PFHxS		PFOA	PFNA	PFOS	PFHxS
Average	199.063	1.83359					Average	5.50385		0.968769	1.38323		1.89729		0.284964	0.395937
Min	224.705	1.62435					95 % CI LL	4.94324		0.77374	1.21736	removal (avg, relative to current DW)	0.65528		0.70585	0.713759
Max	173.422	2.1047					95 % CI UL	6.06445		1.1638	1.5491
GAC amounts used in 2024
GAC density (based on 2022 data)	376.5	kg/m3
Volume per GAC filter	145	m3/filter
Number of GAC filters in stage 2	20
New GAC used in 2024	930920	kg (per year)
% regenerated carbon in 2024	0.875
Total volume of GAC filters	2900	m3
Total volume of new GAC entering treatment plant in 2024	2472.56	m3
renewed filters in 2024	17
Regeneration frequency in 2024	0.852608	per year	alternative calculation based on nr. of renewed filters
Average time until regeneration in 2024	428.098	days	429.412	days	~ same result
		increased regeneration frequency ('new' scenario)
Units: kg (per year)	2024 ('old' scenario)	average	min	max
Virgin GAC	116365	250250	221693	287251
Regenerated GAC	814555	1.75175e+06	1.55185e+06	2.01076e+06
Total GAC	930920	2.002e+06	1.77355e+06	2.29801e+06
Drinking water conc. 2024 (ng PEQ/L; recorded data)	10.364	*Leiduin 1 and 2 taken independently, not weighed
Calculate concentration from known stand time
Raw water concentration (ng PEQ/L)	21.5935
stand time * 0.5	214.049
m	0.00204723
breakthrough	0.438208
concentration in drinking water	9.46247
difference with actual concentration	0.0869863
Check if assumption to ignore 1st stage is valid (for 2024 data):
Calculate concentration from known stand time	stage 1	stage 2	time in stage 1
stand time filter (days)	556.528	428.098	128.429
m	0.00204723	0.00204723
breakthrough	1.13934	0.876417
influent	21.5935	Influent ng PEQ/L
after 1st stage	21.6446	ng PEQ/L
after 2nd stage	9.48484	ng PEQ/L	Very similar result
relative difference:	0.0848281

## Sheet: InfluentData
Raw water concentrations, ng/L		PFOA	PFNA	PFOS	PFHxS	PEQ_LB
	slope (m) of regression model	0.0023788		0.0007122	0.001755	0.00204723		Uncertainty analysis over PEQ concentrations
	2024-12-02 11:01:00	7.2	<0.5	4.2	2	18.8336		slope average	0.00204723
	2024-11-04 13:02:00	7.6	0.5	4.5	2.2	25.2524		standard error slope	5.32111e-05
	2024-10-07 13:18:00	7.8	0.74	4.4	2.2	28.1683		standard error influent conc. (2024)	1.20956	tinv influent	2.14479	95% CI influent	2.59426
	2024-09-09 11:31:00	8.3	0.5	5.1	2.1	27.6408		standard error time to regeneration	12.2925	1.60556	0.345691
	2024-08-12 13:25:00	9.1	0.5	4.3	2.4	32.3169		degrees of freedom influent conc.	14	in 2024
	2024-07-16 13:32:00	10	<0.50	4.4	2.5	22.7863		degrees of freedom slope	242
	2024-07-15 13:28:00	8.9	<0.50	3.2	2.3	19.3492				var slope	var influent
	2024-07-03 07:04:00	8	<0.50	4.2	2.4	20.3051		effective degrees of freedom	20.6223	26.7703	124.335
	2024-06-17 11:33:00	8.1	<0.50	3.3	2.2	18.1861		t-value	2.08596
	2024-05-21 10:47:00	8.3	<0.50	3.5	2.2	18.7871		95% CI time to regeneration	25.6417
	2024-04-22 12:53:00	7	<0.50	3.2	2.3	16.5027
	2024-03-25 12:39:00	6.9	<0.50	3.4	2.1	16.4771
	2024-02-26 14:17:00	7.8	<0.50	3.8	2.3	18.755
	2024-01-29 10:47:00	7.5	<0.50	4.3	2.4	19.962
	2024-01-02 14:02:00	7.7	<0.50	4.5	2.4	20.5806
								Removal required:	breakthrough	time to regeneration/2	time to regeneration	regenerations per year
	AVERAGE 2024	8.01333	0.56	4.02	2.26667	21.5935		0.796235	0.203765	99.5317	199.063	1.83359
	MIN 2024	6.9	0.5	3.2	2	16.4771		0.732963	0.267037	112.353	224.705	1.62435
	MAX 2024	10	0.74	5.1	2.5	32.3169		0.863849	0.136151	86.7109	173.422	2.1047
breakthrough at prospective regeneration frequency:		0.236766	0	0.0708865	0.174678	0.203765
prospective concentration:		1.89729	0	0.284964	0.395937	4.4

## Sheet: PFOA
Description	Date of sample	Component	Unit	Value	Weight	Concentration
Drinkwater Leiduin 2	2024-12-02 10:31:00	som L-PFOA en B-PFOA, indicatief	ng/l	4.4	0.3	4.26	avg	5.50385
Drinkwater Leiduin 1	2024-12-02 10:21:00	som L-PFOA en B-PFOA, indicatief	ng/l	4.2	0.7		min	4.11
Drinkwater Leiduin 2	2024-11-04 11:19:00	som L-PFOA en B-PFOA, indicatief	ng/l	4.7	0.3	4.56	max	7.11
Drinkwater Leiduin 1	2024-11-04 11:06:00	som L-PFOA en B-PFOA, indicatief	ng/l	4.5	0.7		std	0.927708
Drinkwater Leiduin 2	2024-10-07 10:30:00	som L-PFOA en B-PFOA, indicatief	ng/l	3.9	0.3	4.11	standard error	0.2573
Drinkwater Leiduin 1	2024-10-07 10:03:00	som L-PFOA en B-PFOA, indicatief	ng/l	4.2	0.7		t-value	2.17881
Drinkwater Leiduin 2	2024-09-09 10:02:00	som L-PFOA en B-PFOA, indicatief	ng/l	5	0.3	5.7	margin of error	0.560608
Drinkwater Leiduin 1	2024-09-09 10:01:00	som L-PFOA en B-PFOA, indicatief	ng/l	6	0.7		lower limit	4.94324
Drinkwater Leiduin 2	2024-08-12 12:58:00	som L-PFOA en B-PFOA, indicatief	ng/l	5.8	0.3	6.29	upper limit	6.06445
Drinkwater Leiduin 1	2024-08-12 11:11:00	som L-PFOA en B-PFOA, indicatief	ng/l	6.5	0.7
Drinkwater Leiduin 1	2024-07-15 10:41:00	som L-PFOA en B-PFOA, indicatief	ng/l	5	0.7	5.12
Drinkwater Leiduin 2	2024-07-15 10:40:00	som L-PFOA en B-PFOA, indicatief	ng/l	5.4	0.3
Drinkwater Leiduin 2	2024-06-17 10:29:00	som L-PFOA en B-PFOA, indicatief	ng/l	4.7	0.3	5.05
Drinkwater Leiduin 1	2024-06-17 09:25:00	som L-PFOA en B-PFOA, indicatief	ng/l	5.2	0.7
Drinkwater Leiduin 2	2024-05-21 11:25:00	som L-PFOA en B-PFOA, indicatief	ng/l	6.9	0.3	7.11
Drinkwater Leiduin 1	2024-05-21 06:59:00	som L-PFOA en B-PFOA, indicatief	ng/l	7.2	0.7
Drinkwater Leiduin 2	2024-04-22 12:28:00	som L-PFOA en B-PFOA, indicatief	ng/l	5.7	0.3	5.77
Drinkwater Leiduin 1	2024-04-22 10:09:00	som L-PFOA en B-PFOA, indicatief	ng/l	5.8	0.7
Drinkwater Leiduin 2	2024-03-25 12:14:00	som L-PFOA en B-PFOA, indicatief	ng/l	5.2	0.3	4.99
Drinkwater Leiduin 1	2024-03-25 09:53:00	som L-PFOA en B-PFOA, indicatief	ng/l	4.9	0.7
Drinkwater Leiduin 2	2024-02-26 11:03:00	som L-PFOA en B-PFOA, indicatief	ng/l	5.9	0.3	5.76
Drinkwater Leiduin 1	2024-02-26 10:25:00	som L-PFOA en B-PFOA, indicatief	ng/l	5.7	0.7
Drinkwater Leiduin 2	2024-01-29 10:57:00	som L-PFOA en B-PFOA, indicatief	ng/l	6.8	0.3	6.8
Drinkwater Leiduin 1	2024-01-29 07:52:00	som L-PFOA en B-PFOA, indicatief	ng/l	6.8	0.7
Drinkwater Leiduin 2	2024-01-02 12:42:00	som L-PFOA en B-PFOA, indicatief	ng/l	6.1	0.3	6.03
Drinkwater Leiduin 1	2024-01-02 12:17:00	som L-PFOA en B-PFOA, indicatief	ng/l	6	0.7

## Sheet: PFNA
Description	Date of sample	Component	Unit	Value	Weight	Concentration
Drinkwater Leiduin 1	2024-12-02 10:21:00	perfluornonaanzuur (PFNA)	ng/l	<0.50	0.7	#VALUE!	avg	#VALUE!
Drinkwater Leiduin 2	2024-12-02 10:31:00	perfluornonaanzuur (PFNA)	ng/l	<0.50	0.3		min	#VALUE!
Drinkwater Leiduin 2	2024-11-04 11:19:00	perfluornonaanzuur (PFNA)	ng/l	<0.50	0.3	#VALUE!	max	#VALUE!
Drinkwater Leiduin 1	2024-11-04 11:06:00	perfluornonaanzuur (PFNA)	ng/l	<0.50	0.7		std	#VALUE!
Drinkwater Leiduin 2	2024-10-07 10:30:00	perfluornonaanzuur (PFNA)	ng/l	<0.50	0.3	#VALUE!	standard error	#VALUE!
Drinkwater Leiduin 1	2024-10-07 10:03:00	perfluornonaanzuur (PFNA)	ng/l	<0.50	0.7		t-value	#NUM!
Drinkwater Leiduin 2	2024-09-09 10:02:00	perfluornonaanzuur (PFNA)	ng/l	<0.50	0.3	#VALUE!	margin of error	#NUM!
Drinkwater Leiduin 1	2024-09-09 10:01:00	perfluornonaanzuur (PFNA)	ng/l	<0.50	0.7		lower limit	#VALUE!
Drinkwater Leiduin 2	2024-08-12 12:58:00	perfluornonaanzuur (PFNA)	ng/l	<0.50	0.3	#VALUE!	upper limit	#VALUE!
Drinkwater Leiduin 1	2024-08-12 11:11:00	perfluornonaanzuur (PFNA)	ng/l	<0.50	0.7
Drinkwater Leiduin 1	2024-07-15 10:41:00	perfluornonaanzuur (PFNA)	ng/l	<0.50	0.7	#VALUE!
Drinkwater Leiduin 2	2024-07-15 10:40:00	perfluornonaanzuur (PFNA)	ng/l	<0.50	0.3
Drinkwater Leiduin 2	2024-06-17 10:29:00	perfluornonaanzuur (PFNA)	ng/l	<0.50	0.3	#VALUE!
Drinkwater Leiduin 1	2024-06-17 09:25:00	perfluornonaanzuur (PFNA)	ng/l	<0.50	0.7
Drinkwater Leiduin 2	2024-05-21 11:25:00	perfluornonaanzuur (PFNA)	ng/l	<0.50	0.3	#VALUE!
Drinkwater Leiduin 1	2024-05-21 06:59:00	perfluornonaanzuur (PFNA)	ng/l	<0.50	0.7
Drinkwater Leiduin 2	2024-04-22 12:28:00	perfluornonaanzuur (PFNA)	ng/l	<0.50	0.3	#VALUE!
Drinkwater Leiduin 1	2024-04-22 10:09:00	perfluornonaanzuur (PFNA)	ng/l	<0.50	0.7
Drinkwater Leiduin 2	2024-03-25 12:14:00	perfluornonaanzuur (PFNA)	ng/l	<0.50	0.3	#VALUE!
Drinkwater Leiduin 1	2024-03-25 09:53:00	perfluornonaanzuur (PFNA)	ng/l	<0.50	0.7
Drinkwater Leiduin 2	2024-02-26 11:03:00	perfluornonaanzuur (PFNA)	ng/l	<0.50	0.3	#VALUE!
Drinkwater Leiduin 1	2024-02-26 10:25:00	perfluornonaanzuur (PFNA)	ng/l	<0.50	0.7
Drinkwater Leiduin 2	2024-01-29 10:57:00	perfluornonaanzuur (PFNA)	ng/l	<0.50	0.3	#VALUE!
Drinkwater Leiduin 1	2024-01-29 07:52:00	perfluornonaanzuur (PFNA)	ng/l	<0.50	0.7
Drinkwater Leiduin 2	2024-01-02 12:42:00	perfluornonaanzuur (PFNA)	ng/l	<0.50	0.3	#VALUE!
Drinkwater Leiduin 1	2024-01-02 12:17:00	perfluornonaanzuur (PFNA)	ng/l	<0.50	0.7

## Sheet: PFOS
Description	Date of sample	Component	Unit	Value	Weight	Concentration
Drinkwater Leiduin 2	2024-12-02 10:31:00	som L-PFOS en B-PFOS, indicatief	ng/l	0.72	0.3	0.748	avg	0.968769
Drinkwater Leiduin 1	2024-12-02 10:21:00	som L-PFOS en B-PFOS, indicatief	ng/l	0.76	0.7		min	0.209
Drinkwater Leiduin 2	2024-11-04 11:19:00	som L-PFOS en B-PFOS, indicatief	ng/l	0.76	0.3	0.879	max	1.64
Drinkwater Leiduin 1	2024-11-04 11:06:00	som L-PFOS en B-PFOS, indicatief	ng/l	0.93	0.7		std	0.322739
Drinkwater Leiduin 2	2024-10-07 10:30:00	som L-PFOS en B-PFOS, indicatief	ng/l	0.71	0.3	0.766	standard error	0.0895117
Drinkwater Leiduin 1	2024-10-07 10:03:00	som L-PFOS en B-PFOS, indicatief	ng/l	0.79	0.7		t-value	2.17881
Drinkwater Leiduin 2	2024-09-09 10:02:00	som L-PFOS en B-PFOS, indicatief	ng/l	1	0.3	1.07	margin of error	0.195029
Drinkwater Leiduin 1	2024-09-09 10:01:00	som L-PFOS en B-PFOS, indicatief	ng/l	1.1	0.7		lower limit	0.77374
Drinkwater Leiduin 2	2024-08-12 12:58:00	som L-PFOS en B-PFOS, indicatief	ng/l	1.1	0.3	1.03	upper limit	1.1638
Drinkwater Leiduin 1	2024-08-12 11:11:00	som L-PFOS en B-PFOS, indicatief	ng/l	1	0.7
Drinkwater Leiduin 1	2024-07-15 10:41:00	som L-PFOS en B-PFOS, indicatief	ng/l	<0.20	0.7	0.209	* value below LOQ replaced with LOQ
Drinkwater Leiduin 2	2024-07-15 10:40:00	som L-PFOS en B-PFOS, indicatief	ng/l	0.23	0.3
Drinkwater Leiduin 2	2024-06-17 10:29:00	som L-PFOS en B-PFOS, indicatief	ng/l	0.94	0.3	0.982
Drinkwater Leiduin 1	2024-06-17 09:25:00	som L-PFOS en B-PFOS, indicatief	ng/l	1	0.7
Drinkwater Leiduin 2	2024-05-21 11:25:00	som L-PFOS en B-PFOS, indicatief	ng/l	1.5	0.3	1.64
Drinkwater Leiduin 1	2024-05-21 06:59:00	som L-PFOS en B-PFOS, indicatief	ng/l	1.7	0.7
Drinkwater Leiduin 2	2024-04-22 12:28:00	som L-PFOS en B-PFOS, indicatief	ng/l	1.2	0.3	1.2
Drinkwater Leiduin 1	2024-04-22 10:09:00	som L-PFOS en B-PFOS, indicatief	ng/l	1.2	0.7
Drinkwater Leiduin 2	2024-03-25 12:14:00	som L-PFOS en B-PFOS, indicatief	ng/l	1	0.3	1.07
Drinkwater Leiduin 1	2024-03-25 09:53:00	som L-PFOS en B-PFOS, indicatief	ng/l	1.1	0.7
Drinkwater Leiduin 2	2024-02-26 11:03:00	som L-PFOS en B-PFOS, indicatief	ng/l	1.1	0.3	1.03
Drinkwater Leiduin 1	2024-02-26 10:25:00	som L-PFOS en B-PFOS, indicatief	ng/l	1	0.7
Drinkwater Leiduin 2	2024-01-29 10:57:00	som L-PFOS en B-PFOS, indicatief	ng/l	1.2	0.3	1.13
Drinkwater Leiduin 1	2024-01-29 07:52:00	som L-PFOS en B-PFOS, indicatief	ng/l	1.1	0.7
Drinkwater Leiduin 2	2024-01-02 12:42:00	som L-PFOS en B-PFOS, indicatief	ng/l	0.84	0.3	0.84
Drinkwater Leiduin 1	2024-01-02 12:17:00	som L-PFOS en B-PFOS, indicatief	ng/l	0.84	0.7

## Sheet: PFHxS
Description	Date of sample	Component	Unit	Value	Weight	Concentration
Drinkwater Leiduin 2	2024-12-02 10:31:00	som L-PFHxS en B-PFHxS, indicatief	ng/l	0.94	0.3	0.968	avg	1.38323
Drinkwater Leiduin 1	2024-12-02 10:21:00	som L-PFHxS en B-PFHxS, indicatief	ng/l	0.98	0.7		min	0.967
Drinkwater Leiduin 2	2024-11-04 11:19:00	som L-PFHxS en B-PFHxS, indicatief	ng/l	0.99	0.3	1.067	max	1.87
Drinkwater Leiduin 1	2024-11-04 11:06:00	som L-PFHxS en B-PFHxS, indicatief	ng/l	1.1	0.7		std	0.274491
Drinkwater Leiduin 2	2024-10-07 10:30:00	som L-PFHxS en B-PFHxS, indicatief	ng/l	0.89	0.3	0.967	standard error	0.0761302
Drinkwater Leiduin 1	2024-10-07 10:03:00	som L-PFHxS en B-PFHxS, indicatief	ng/l	1	0.7		t-value	2.17881
Drinkwater Leiduin 2	2024-09-09 10:02:00	som L-PFHxS en B-PFHxS, indicatief	ng/l	1.3	0.3	1.44	margin of error	0.165873
Drinkwater Leiduin 1	2024-09-09 10:01:00	som L-PFHxS en B-PFHxS, indicatief	ng/l	1.5	0.7		lower limit	1.21736
Drinkwater Leiduin 2	2024-08-12 12:58:00	som L-PFHxS en B-PFHxS, indicatief	ng/l	1.6	0.3	1.6	upper limit	1.5491
Drinkwater Leiduin 1	2024-08-12 11:11:00	som L-PFHxS en B-PFHxS, indicatief	ng/l	1.6	0.7
Drinkwater Leiduin 1	2024-07-15 10:41:00	som L-PFHxS en B-PFHxS, indicatief	ng/l	1.3	0.7	1.3
Drinkwater Leiduin 2	2024-07-15 10:40:00	som L-PFHxS en B-PFHxS, indicatief	ng/l	1.3	0.3
Drinkwater Leiduin 2	2024-06-17 10:29:00	som L-PFHxS en B-PFHxS, indicatief	ng/l	1.1	0.3	1.24
Drinkwater Leiduin 1	2024-06-17 09:25:00	som L-PFHxS en B-PFHxS, indicatief	ng/l	1.3	0.7
Drinkwater Leiduin 2	2024-05-21 11:25:00	som L-PFHxS en B-PFHxS, indicatief	ng/l	1.8	0.3	1.87
Drinkwater Leiduin 1	2024-05-21 06:59:00	som L-PFHxS en B-PFHxS, indicatief	ng/l	1.9	0.7
Drinkwater Leiduin 2	2024-04-22 12:28:00	som L-PFHxS en B-PFHxS, indicatief	ng/l	1.5	0.3	1.5
Drinkwater Leiduin 1	2024-04-22 10:09:00	som L-PFHxS en B-PFHxS, indicatief	ng/l	1.5	0.7
Drinkwater Leiduin 2	2024-03-25 12:14:00	som L-PFHxS en B-PFHxS, indicatief	ng/l	1.4	0.3	1.47
Drinkwater Leiduin 1	2024-03-25 09:53:00	som L-PFHxS en B-PFHxS, indicatief	ng/l	1.5	0.7
Drinkwater Leiduin 2	2024-02-26 11:03:00	som L-PFHxS en B-PFHxS, indicatief	ng/l	1.5	0.3	1.43
Drinkwater Leiduin 1	2024-02-26 10:25:00	som L-PFHxS en B-PFHxS, indicatief	ng/l	1.4	0.7
Drinkwater Leiduin 2	2024-01-29 10:57:00	som L-PFHxS en B-PFHxS, indicatief	ng/l	1.8	0.3	1.73
Drinkwater Leiduin 1	2024-01-29 07:52:00	som L-PFHxS en B-PFHxS, indicatief	ng/l	1.7	0.7
Drinkwater Leiduin 2	2024-01-02 12:42:00	som L-PFHxS en B-PFHxS, indicatief	ng/l	1.4	0.3	1.4
Drinkwater Leiduin 1	2024-01-02 12:17:00	som L-PFHxS en B-PFHxS, indicatief	ng/l	1.4	0.7
