# Supplementary material for: PFAS drinking water treatment trade-offs: comparing the health burden of GAC treatment to the health benefits of reduced PFAS exposure
Source: Royal Society of Chemistry journal article supplement (doi:10.1039/d5em00238a), 2025-01-01
Supplement: d5em00238a3.xlsx [file d5em00238a3.xlsx]

## Sheet: Summary_allEndpoints
Endpoint	BestEstimate	LowDW	HighDW	LowOverall	HighOverall
Kidney Cancer	22.6913	19.2115	26.153	3.84279	45.6539
Testicular Cancer	0.151854	0.128296	0.175388	0.0859625	0.232602
Hypothyroidism	12.8286	11.4401	14.0605	4.31335	14.0605
Hypertension	119.084	95.7504	139.36	0	237.053
Infectious diseases	0	4.60072	5.28569	0	5.28569

## Sheet: TotalDALYs_perScenario
Scenario\Endpoint	Testicular Cancer	Kidney Cancer	Hypothyroidism, PFOA	Hypothyroidism, PFOS	Hypertension	total
EFSA-recommended exposure, best estimate	0.26486	41.3073	62.6115	69.8186	0	174.002
EFSA-recommended exposure, lower bound	0.176906	7.93566	7.09626	15.6478	0	30.8567
EFSA-recommended exposure, upper bound	0.352483	75.4992	78.5706	81.7118	0	236.134
Target DW concentrations, best estimate	0.289881	45.1071	66.1798	66.6645	0	178.241
Target DW concentrations, lower bound	0.193653	8.6853	7.97427	14.0859	0	30.9392
Target DW concentrations, upper bound	0.385713	82.2535	80.4118	80.2947	0	243.346
Current DW concentrations, best estimate	0.441735	67.7984	76.7221	68.9508	119.084	332.997
Current DW concentrations, lower bound	0.279615	12.5281	11.4758	14.9657	0	39.2492
Current DW concentrations, upper bound	0.618315	127.907	84.259	81.5275	237.053	531.365
delta DALYs from treatment, best estimate	0.151854	22.6913	10.5422	2.28633	119.084	154.756

## Sheet: OverviewSerumConcentrations
Currently used in calculations		serum conc ng/mL	Copy-paste data here from below to use in calculation
Use for endpoint	Population/ PFAS	EFSA recommended exposure	Prospective DW conc.	Current DW conc. Mean	Current DW conc. LL	Current DW Conc. UL
Kidney cancer & hypertension, PFOA	Adults 20-82	2.0031	2.184	3.2858	3.1144	3.4572
Testicular cancer, PFOA	Male 18-82	1.9926	2.1725	3.2685	3.098	3.439
Hypothyroidism, PFOA	Female, 18-49	1.9445	2.1201	3.1897	3.0233	3.3561
Hypothyroidism, PFOS	Female, 18-49	4.7206	3.9831	4.4903	4.381	4.6003
Food exposure at EFSA recommendation
Use for endpoint	Population/ PFAS	EFSA recommended exposure	Prospective DW conc.	Current DW conc. Mean	Current DW conc. LL	Current DW Conc. UL
Kidney cancer & hypertension, PFOA	Adults 20-82	2.0031	2.184	3.2858	3.1144	3.4572
Testicular cancer, PFOA	Male 18-82	1.9926	2.1725	3.2685	3.098	3.439
Hypothyroidism, PFOA	female, 18-49	1.9445	2.1201	3.1897	3.0233	3.3561
Hypothyroidism, PFOS	female, 18-49	4.7206	3.9831	4.4903	4.381	4.6003
Food exposure at current LL levels
Use for endpoint	Population/ PFAS	EFSA recommended exposure	Prospective DW conc.	Current DW conc. Mean	Current DW conc. LL	Current DW Conc. UL
Kidney cancer & hypertension, PFOA	Adults 20-82	2.0031	0.62007	1.7219	1.5505	1.8933
Testicular cancer, PFOA	Male 18-82	1.9926	0.6168	1.7128	1.5423	1.8833
Hypothyroidism, PFOA	female, 18-49	1.9445	0.60193	1.6715	1.5051	1.8379
Hypothyroidism, PFOS	female, 18-49	4.7206	0.85941	1.3667	1.2573	1.4761
Food exposure at current UL levels
Use for endpoint	Population/ PFAS	EFSA recommended exposure	Prospective DW conc.	Current DW conc. Mean	Current DW conc. LL	Current DW Conc. UL
Kidney cancer & hypertension, PFOA	Adults 20-82	2.0031	3.5198	4.6216	4.4502	4.793
Testicular cancer, PFOA	Male 18-82	1.9926	3.5012	4.5972	4.4267	4.7677
Hypothyroidism, PFOA	female, 18-49	1.9445	3.4168	4.4864	4.32	4.6528
Hypothyroidism, PFOS	female, 18-49	4.7206	1.3208	1.8281	1.7188	1.9375
Food exposure at zero
Use for endpoint	Population/ PFAS	EFSA recommended exposure - set to 0 in this scenario	Prospective DW conc.	Current DW conc. Mean	Current DW conc. LL	Current DW Conc. UL
Kidney cancer & hypertension, PFOA	Adults 20-82	1.2984e-08	0.5815	1.6833	1.5119	1.8547
Testicular cancer, PFOA	Male 18-82	2.1445e-08	0.57844	1.6744	1.5039	1.8449
Hypothyroidism, PFOA	female, 18-49	4.2727e-08	0.5645	1.6341	1.4677	1.8005
Hypothyroidism, PFOS	female, 18-49	4.6485e-05	0.20661	0.7139	0.60455	0.82326
Food exposure at 8 times EFSA exposure
Use for endpoint	Population/ PFAS	EFSA recommended exposure	Prospective DW conc.	Current DW conc. Mean	Current DW conc. LL	Current DW Conc. UL
Kidney cancer & hypertension, PFOA	Adults 20-82	2.0031	16.606	17.708	17.537	17.88
Testicular cancer, PFOA	Male 18-82	1.9926	16.519	17.615	17.444	17.785
Hypothyroidism, PFOA	female, 18-49	1.9445	16.121	17.19	17.024	17.357
Hypothyroidism, PFOS	female, 18-49	4.7206	37.969	38.477	38.367	38.586

## Sheet: Kidney cancer
		Population:	Adults 20+	Size per 10^6 people:	792235		Note: ERR data is based on adults >18, whereas incidence & prevalence data is based on adults >20. Assumed to have a minor effect on results.
		ERR	0.16	per	10	ng/mL PFOA	ERR data from: https://doi.org/10.1007/s12403-022-00496-y
		ERR, 95% lower limit	0.03	per	10	ng/mL PFOA	Original publication, for confidence data:	https://doi.org/10.1080/10962247.2021.1909668
		ERR, 95% upper limit	0.3	per	10	ng/mL PFOA
		Prevalence, kidney cancer	0.000454897	5-year prevalence, >20 years old adults; the Netherlands, 2023, <10% so OR can be used instead of RR. Includes patients in remission	from: https://nkr-cijfers.iknl.nl/viewer/prevalentie-per-jaar?language=nl_NL&viewerId=51059014-d140-4975-bb1f-b9a1009061a9
		Incidence, kidney cancer	0.000194	cases per adult>20 per year, the Netherlands	from: https://nkr-cijfers.iknl.nl/viewer/incidentie-per-jaar?language=nl_NL&viewerId=5252f690-44df-4b35-9fa6-557cc650b70f; age group all >20; male + female; year 2023
		DALYs per case, kidney cancer	9.09529	Kidney cancer DALY data from: https://doi.org/10.1038/s41598-020-70840-2	total incidence kidney cancer cases; the Netherlands; 2017	2802	total nr. DALYs from kidney cancer; the Netherlands; 2017	25485
ERR best estimate	Reference level for ERR	Reference: EFSA guideline	Reference: Prospective exposure	Drinking water current:	Drinking water low:	Drinking water high	Overall low
PFOA serum concentrations ng/mL, EFSA model, average age 18-81.8 (life expectancy in NL: https://www.cbs.nl/nl-nl/visualisaties/dashboard-bevolking/levensloop/verweduwen)	0.1	2.0031	2.184	3.2858	3.1144	3.4572	3.84279
OR	1	1.03045	1.03334	1.05097	1.04823	1.05372	Overall high
Attributable fraction	0	0.0295498	0.0322681	0.0485006	0.0460113	0.050977	45.6539
Number of new kidney cancer cases per year associated with PFOA, per 10^6 people	0	4.54162	4.95939	7.45423	7.07164	7.83484
DALYs associated with PFAS in drinking water	0	41.3073	45.1071	67.7984	64.3186	71.2601
DALYs gained from treatment				22.6913	19.2115	26.153
ERR lower limit
PFOA serum concentrations ng/mL, EFSA model, average age 18-81.8 (life expectancy in NL: https://www.cbs.nl/nl-nl/visualisaties/dashboard-bevolking/levensloop/verweduwen)	0.1	2.0031	2.184	3.2858	3.1144	3.4572
OR	1	1.00571	1.00625	1.00956	1.00904	1.01007
Attributable fraction	0	0.00567689	0.00621316	0.00946692	0.00896215	0.00997117
Number of new kidney cancer cases per year associated with PFOA, per 10^6 people	0	0.872502	0.954922	1.45501	1.37743	1.53251
DALYs associated with PFAS in drinking water	0	7.93566	8.6853	13.2337	12.5281	13.9386
DALYs gained from treatment				4.5484	3.84279	5.25329
ERR upper limit
PFOA serum concentrations ng/mL, EFSA model, average age 18-81.8 (life expectancy in NL: https://www.cbs.nl/nl-nl/visualisaties/dashboard-bevolking/levensloop/verweduwen)	0.1	2.0031	2.184	3.2858	3.1144	3.4572
OR	1	1.05709	1.06252	1.09557	1.09043	1.10072
Attributable fraction	0	0.0540094	0.0588412	0.0872365	0.0829323	0.0915004
Number of new kidney cancer cases per year associated with PFOA, per 10^6 people	0	8.30091	9.04353	13.4077	12.7462	14.063
DALYs associated with PFAS in drinking water	0	75.4992	82.2535	121.947	115.93	127.907
DALYs gained from treatment				39.6933	33.6766	45.6539

## Sheet: Testicular cancer
		Population:	Males 18+	Size per 10^6 people:	402941	Note: ERR data is based on adults >18, whereas incidence & prevalence data is based on adults >20. Assumed to have a minor effect on results.
		ERR	0.03	per	10	ng/mL PFOA	from: https://doi.org/10.1007/s12403-022-00496-y
		ERR, 95% lower limit	0.02	per	10	ng/mL PFOA	Original publication, for confidence data:	https://doi.org/10.1080/10962247.2021.1909668
		ERR, 95% upper limit	0.04	per	10	ng/mL PFOA
		Prevalence, testicular cancer	0.000592418	5-year prevalence, >20 years old men; the Netherlands, 2023 <10% so OR can be used instead of RR. Includes patients in remission		from: https://doi.org/10.1007/s12403-022-00496-y
		Incidence, testicular cancer	6.4e-05	cases per adult male per year, the NL, 2023		from: https://nkr-cijfers.iknl.nl/viewer/incidentie-per-jaar?language=nl_NL&viewerId=c57bba3b-6e42-4eb9-9748-6c33ab7e9c5b
		DALYs per case, testicular cancer	1.81917			Testicular cancer DALY data from: https://doi.org/10.1111/bju.14771
						total incidence testicular cancer cases; Western Europe, 2016	14417	total nr. DALYs from testicular; Western Europe, 2016	26227
ERR best estimate	Reference level for ERR	Reference: EFSA guideline	Reference: Prospective exposure	Drinking water current:	Drinking water low:	Drinking water high
PFOA serum concentrations ng/mL, EFSA model, average age 18-81.8 (life expectancy in NL: https://www.cbs.nl/nl-nl/visualisaties/dashboard-bevolking/levensloop/verweduwen)	0.1	1.9926	2.1725	3.2685	3.098	3.439
OR	1	1.00568	1.00622	1.00951	1.00899	1.01002	Overall low
Attributable fraction	0	0.00564574	0.00617908	0.009416	0.00891383	0.00991765	0.0859625
Number of new kidney cancer cases per year associated with PFOA, per 10^6 people	0	0.145594	0.159348	0.242822	0.229872	0.255759	overall high
DALYs associated with PFAS in drinking water	0	0.26486	0.289881	0.441735	0.418176	0.465269	0.232602
DALYs gained from treatment				0.151854	0.128296	0.175388
ERR lower limit
PFOA serum concentrations ng/mL, EFSA model, average age 18-81.8 (life expectancy in NL: https://www.cbs.nl/nl-nl/visualisaties/dashboard-bevolking/levensloop/verweduwen)	0.1	1.9926	2.1725	3.2685	3.098	3.439
OR	1	1.00379	1.00415	1.00634	1.006	1.00668
Attributable fraction	0	0.00377093	0.00412789	0.0062971	0.00596026	0.0066337
Number of new kidney cancer cases per year associated with PFOA, per 10^6 people	0	0.0972455	0.106451	0.162391	0.153705	0.171071
DALYs associated with PFAS in drinking water	0	0.176906	0.193653	0.295417	0.279615	0.311208
DALYs gained from treatment				0.101764	0.0859625	0.117556
ERR lower limit
PFOA serum concentrations ng/mL, EFSA model, average age 18-81.8 (life expectancy in NL: https://www.cbs.nl/nl-nl/visualisaties/dashboard-bevolking/levensloop/verweduwen)	0.1	1.9926	2.1725	3.2685	3.098	3.439
OR	1	1.00757	1.00829	1.01267	1.01199	1.01336
Attributable fraction	0	0.00751352	0.00822184	0.0125154	0.0118499	0.01318
Number of new kidney cancer cases per year associated with PFOA, per 10^6 people	0	0.19376	0.212027	0.322749	0.305588	0.339888
DALYs associated with PFAS in drinking water	0	0.352483	0.385713	0.587137	0.555917	0.618315
DALYs gained from treatment				0.201424	0.170204	0.232602

## Sheet: Hypothyroidism
		Population:	Females 18-49 (incl)	Size per 10^6 people:	200412	Note: population size and OR/ERR are based on females age 18-49, but prevalence & incidence rates are based on females age 20-49. The difference this would make was assumed negligible.
		ERR	7.42	per	ln(PFOA(ng/mL))	from: https://doi.org/10.1007/s12403-022-00496-y
		ERR, low estimate	1.14	per	ln(PFOA(ng/mL))	Original publication, for confidence interval data:		https://doi.org/10.1210/jc.2013-1282
		ERR, high estimate	48.12	per	ln(PFOA(ng/mL))
		Prevalence, hypothyroidism	0.0322901	cases per female 18-49		For data source, see table on the right
		Incidence, hypothyroidism	0.00223329	cases per female 18-49 per year		Incidence value agrees with 0.00226 used by Obsekov et al.			Total best:	12.8286
		DALYs per case, hypothyroidism	0.19						DW low	11.4401		DALY weight:	0.019	from: https://cdn.who.int/media/docs/default-source/gho-documents/global-health-estimates/ghe2019_daly-methods.pdf?sfvrsn=31b25009_7
									DW high	14.0605		Duration	10	years	from:	https://doi.org/10.1007/s12403-022-00496-y
ERR best estimate	Reference level for ERR	Reference: EFSA guideline	Reference: Prospective exposure	Drinking water current:	Drinking water low:	Drinking water high			Total min:	4.31335
PFOA serum concentrations, EFSA model, average age 18-49 ng/mL	1	1.9445	2.1201	3.1897	3.0233	3.3561			total max:	14.0605
ln(PFOA(ng/mL/Cref)	0	0.665005	0.751463	1.15993	1.10635	1.21078					Incidence & Prevalence data			From:https://www.nivel.nl/nl/zorg-en-ziekte-in-cijfers/cijfers-ziekten-op-jaarbasis
OR	1	3.7916	4.50896	10.2236	9.1827	11.3205			10.5422				Incidence (new cases per 1000 people per year)			Prevalence (cases per 1000 people)
RR	1	3.47808	4.05007	7.87747	7.26353	8.49093	RR not used, prevalence < 10 %		3.45772	Year	ICPC code (Dutch)		total	men	women	total	men	women	size of age group	relative contribution of age group	Relative incidence	Relative prevalence
Attributable fraction	0	0.736259	0.778219	0.902187	0.8911	0.911665			11.3482	2023	T86		1.1	0.5	1.7	29.3	10.9	47.6
Number of new hypothyroid cases per year associated with PFOA, per 10^6 people	0	329.534	348.315	403.8	398.838	408.042				0-4 jaar			0.1	0.1	0.1	0.9	0.9	0.9
DALYs associated with PFAS	0	62.6115	66.1798	76.7221	75.7792	77.5281				5-9 jaar			<0.1	<0.1	0.1	1.2	1.2	1.2
DALYs gained from treatment				10.5422	9.59933	11.3482			0.178222	10-14 jaar			0.2	0.1	0.3	1.8	1.3	2.2
ERR low estimate										15-19 jaar			0.3	0.2	0.5	3	2.4	3.7
PFOA serum concentrations, EFSA model, average age 18-49 ng/mL	1	1.9445	2.1201	3.1897	3.0233	3.3561				20-24 jaar			0.6	0.1	1.1	5.9	2.7	9.1	587000	0.173259	0.190584	1.57665
ln(PFOA(ng/mL/Cref)	0	0.665005	0.751463	1.15993	1.10635	1.21078				25-29 jaar			1.1	0.2	2.1	11.2	3.9	18.7	579000	0.170897	0.358884	3.19578
OR	1	1.09104	1.10347	1.16414	1.156	1.17192				30-34 jaar			1.6	0.2	3	17.5	4.5	30.8	593000	0.17503	0.525089	5.39091
RR	1	1.08785	1.0998	1.158	1.1502	1.16545				35-39 jaar			1.7	0.5	2.9	23.3	6.1	40.7	563000	0.166175	0.481907	6.76331
Attributable fraction	0	0.0834461	0.0937707	0.140997	0.134946	0.146702				40-44 jaar			1.5	0.6	2.3	26.7	7.3	46	537000	0.158501	0.364551	7.29103
Number of new hypothyroid cases per year associated with PFOA, per 10^6 people	0	37.3488	41.9698	63.1075	60.3989	65.6607				45-49 jaar			1.3	0.6	2	30.6	9.1	51.7	529000	0.156139	0.312279	8.0724
DALYs associated with PFAS in drinking water	0	7.09626	7.97427	11.9904	11.4758	12.4755				50-54 jaar			1.5	0.6	2.4	34.5	10.8	58
DALYs gained from treatment				4.01615	3.50152	4.50127				55-59 jaar			1.4	0.8	2.1	40.7	14.5	67
ERR high estimate										60-64 jaar			1.5	0.9	2.1	46.4	17.7	74.8
PFOA serum concentrations, EFSA model, average age 18-49 ng/mL	1	1.9445	2.1201	3.1897	3.0233	3.3561				65-69 jaar			1.4	0.9	1.9	52.8	21.3	83.5
ln(PFOA(ng/mL/Cref)	0	0.665005	0.751463	1.15993	1.10635	1.21078				70-74 jaar			1.2	0.8	1.7	61.8	26.3	95.7
OR	1	13.1448	18.3741	89.4077	72.6506	108.874				75-79 jaar			1.4	1	1.8	66.9	28.5	101.6
RR	1	9.44205	11.7706	23.1945	21.925	24.2846				80-84 jaar			1.5	1.2	1.7	78.1	37.3	110.7
Attributable fraction	0	0.923924	0.945576	0.988815	0.986235	0.990815				85 jaar en ouder			2	2.3	1.8	93.1	48.9	118.1
Number of new hypothyroid cases per year associated with PFOA, per 10^6 people	0	413.529	423.22	442.573	441.419	443.468						Average 20->49, female:			2.23329			32.2901	check sum	1
DALYs associated with PFAS in drinking water	0	78.5706	80.4118	84.0889	83.8695	84.259
DALYs gained from treatment				3.67711	3.45772	3.84718
DELETE WHEN UPLOADED - to test Obsekov et al. method
Table S5. Hypothyroidism in Females
Exposure	Percentile range of exposure	0-9	2024-10-01	25-49	50-74	75-89	90-99	>99
PFOA	Assigned exposure concentration (ng/mL)	0	0.47	0.67	0.97	1.47	2.37	5.17
	Threshold of exposure	Same outcome for 0.1 ng/mL and 1 ng/mL
	Odds ratio of hypothyroidism in females	1	1	1	1	2.16	5.64	26.9
	Relative risk of hypothyroidism in females	1	1	1	1	2.16	5.56	25
	AF					0.148211	0.313187	0.193548
	size of population					0.15	0.1	0.01
	weighted AF					0.0222317	0.0313187	0.00193548	0.0554859	0.0524859
	Incremental increase of hypothyroidism in females	0	0	0	0	0.15	0.29	0.19
	Attributable fraction of hypothyroidism in females	0.0503
	Attributable cases of hypothyroidism in females	14572							13425.9	difference = nr. of women
	Cost of hypothyroidism in females	$42,083,427
	Indirect cost of attributable hypothyroidism as DALY lost over 10 years	$1,216,259,125
PFOS~	Assigned exposure concentration (ng/mL)	0	1.1	1.7	2.6	3.9	5.7	11.9
	Threshold of exposure	Same outcome for 0.1 ng/mL and 1 ng/mL
	Odds ratio of hypothyroidism in females	1	1.11	1.8	2.88	4.52	6.89	15.6
	Relative risk of hypothyroidism in females	1	1.11	1.8	2.87	4.47	6.77	14.9
	Incremental increase of hypothyroidism in females	0	0.02	0.17	0.32	0.34	0.34	0.12
	Attributable fraction of hypothyroidism in females	0.2069
	Attributable cases of hypothyroidism in females	59939
	Cost of hypothyroidism in females	$173,106,006
	Indirect cost of attributable hypothyroidism as DALY lost over 10 years	$5,002,961,377
	Cost of hypothyroism per case*	$2,888
* adjusted to 2018 dollars
~ used for high cost estimate in sensitivity analysis
	Cost of hypothyroism per case*	$2,888
* adjusted to 2018 dollars
~ used for high cost estimate in sensitivity analysis

## Sheet: Hypothyroidism_PFOS
		Population:	Females 18-49 (incl)	Size per 10^6 people:	200412	Note: population size and OR/ERR are based on females age 18-49, but prevalence & incidence rates are based on females age 20-49. The difference this would make was assumed negligible.
		ERR	3.03	per	ln(PFOS(ng/mL))	from: https://doi.org/10.1007/s12403-022-00496-y
		ERR, low estimate	1.14	per	ln(PFOS(ng/mL))	Original publication, for confidence interval data:	https://doi.org/10.1210/jc.2013-1282
		ERR, high estimate	8.07	per	ln(PFOS(ng/mL))
		Prevalence, hypothyroidism	0.0322901	cases per female 18-49		For data source, see table on the right
		Incidence, hypothyroidism	0.00223329	cases per female 18-49
		DALYs per case, hypothyroidism	0.19								DALY weight:	0.019	from: https://cdn.who.int/media/docs/default-source/gho-documents/global-health-estimates/ghe2019_daly-methods.pdf?sfvrsn=31b25009_7
											Duration	10	years	from:	https://doi.org/10.1007/s12403-022-00496-y
ERR best estimate	Reference level for ERR	Reference: EFSA guideline	Reference: Prospective exposure	Drinking water current:	Drinking water low:	Drinking water high		Min, PFOS:	0.855628
PFOS serum concentrations, EFSA model, average age 18-49 ng/mL	1	4.7206	3.9831	4.4903	4.381	4.6003		Max, PFOS:	2.71226
ln(PFOS(ng/mL/Cref)	0	1.55194	1.38206	1.50192	1.47728	1.52612				Incidence & Prevalence data			From:https://www.nivel.nl/nl/zorg-en-ziekte-in-cijfers/cijfers-ziekten-op-jaarbasis
OR	1	5.58686	4.62789	5.28552	5.14309	5.42925						Incidence (new cases per 1000 people per year)			Prevalence (cases per 1000 people)
Attributable fraction	0	0.821009	0.783919	0.810804	0.805564	0.815813			Year	ICPC code (Dutch)		total	men	women	total	men	women	size of age group	relative contribution of age group	Relative incidence	Relative prevalence
Number of new hypothyroid cases per year associated with PFOA, per 10^6 people	0	367.467	350.866	362.899	360.554	365.141			2023	T86		1.1	0.5	1.7	29.3	10.9	47.6
DALYs associated with PFAS in drinking water	0	69.8186	66.6645	68.9508	68.5053	69.3768			0-4 jaar			0.1	0.1	0.1	0.9	0.9	0.9
DALYs gained from treatment				2.28633	1.84075	2.71226			5-9 jaar			<0.1	<0.1	0.1	1.2	1.2	1.2
ERR low estimate									10-14 jaar			0.2	0.1	0.3	1.8	1.3	2.2
PFOS serum concentrations, EFSA model, average age 18-49 ng/mL	1	4.7206	3.9831	4.4903	4.381	4.6003			15-19 jaar			0.3	0.2	0.5	3	2.4	3.7
ln(PFOS(ng/mL/Cref)	0	1.55194	1.38206	1.50192	1.47728	1.52612			20-24 jaar			0.6	0.1	1.1	5.9	2.7	9.1	587000	0.173259	0.190584	1.57665
OR	1	1.2255	1.19852	1.21749	1.21357	1.22136			25-29 jaar			1.1	0.2	2.1	11.2	3.9	18.7	579000	0.170897	0.358884	3.19578
Attributable fraction	0	0.184005	0.165639	0.17864	0.175984	0.181241			30-34 jaar			1.6	0.2	3	17.5	4.5	30.8	593000	0.17503	0.525089	5.39091
Number of new hypothyroid cases per year associated with PFOA, per 10^6 people	0	82.357	74.1365	79.9556	78.7667	81.1196			35-39 jaar			1.7	0.5	2.9	23.3	6.1	40.7	563000	0.166175	0.481907	6.76331
DALYs associated with PFAS in drinking water	0	15.6478	14.0859	15.1916	14.9657	15.4127			40-44 jaar			1.5	0.6	2.3	26.7	7.3	46	537000	0.158501	0.364551	7.29103
DALYs gained from treatment				1.10563	0.879729	1.32677			45-49 jaar			1.3	0.6	2	30.6	9.1	51.7	529000	0.156139	0.312279	8.0724
ERR high estimate									50-54 jaar			1.5	0.6	2.4	34.5	10.8	58
PFOS serum concentrations, EFSA model, average age 18-49 ng/mL	1	4.7206	3.9831	4.4903	4.381	4.6003			55-59 jaar			1.4	0.8	2.1	40.7	14.5	67
ln(PFOS(ng/mL/Cref)	0	1.55194	1.38206	1.50192	1.47728	1.52612			60-64 jaar			1.5	0.9	2.1	46.4	17.7	74.8
OR	1	25.5511	17.9207	23.0171	21.8627	24.2102			65-69 jaar			1.4	0.9	1.9	52.8	21.3	83.5
Attributable fraction	0	0.960863	0.944198	0.956554	0.95426	0.958695			70-74 jaar			1.2	0.8	1.7	61.8	26.3	95.7
Number of new hypothyroid cases per year associated with PFOA, per 10^6 people	0	430.062	422.604	428.134	427.107	429.092			75-79 jaar			1.4	1	1.8	66.9	28.5	101.6
DALYs associated with PFAS in drinking water	0	81.7118	80.2947	81.3454	81.1503	81.5275			80-84 jaar			1.5	1.2	1.7	78.1	37.3	110.7
DALYs gained from treatment				1.05072	0.855628	1.2328			85 jaar en ouder			2	2.3	1.8	93.1	48.9	118.1
											Average 20->49, female:			2.23329			32.2901	check sum	1

## Sheet: Hypertension
		Population:	People >20	Size per 10^6 people:	792235		All data from, except noted otherwise:	https://www.eionet.europa.eu/etcs/etc-he/products/etc-he-products/etc-he-reports/etc-he-report-2023-13-estimating-the-burden-of-disease-due-to-lead-pfas-phthalates-cadmium-pyrethroids-and-bisphenol-a-using-hbm4eu-data-2013-test-of-feasibility-and-first-results-for-selected-countries
		Exposure effect Min et al.	10.1136/oemed-2011-100288		Beta	alpha
		central	y=2.4119*log PFOA (in µg/L) -0.0045		2.4119	-0.0045
		95%LL	y=1.1825*log PFOA (in µg/L) + 0.4128		1.1825	0.4128
		95%UL	y=4.0353*logPFOA (in µg/L) -0.5417		4.0353	-0.5417
		Prevalence, hypertension	0.208667	cases per adult	Not <10 %, so can't use OR instead of RR -> OR recalculated into RR according to Obsekov et al. method.	Data from:	https://www.nivel.nl/nl/zorg-en-ziekte-in-cijfers/cijfers-ziekten-op-jaarbasis
		Incidence, hypertension	0.00813511	cases per adult	Netherlands 2023
		DALYs per case, hypertension	0.12
										Hypertension without organ damage			Incidence (new cases per 1000 people per year)			Prevalence (cases per 1000 people)					Total			Incidence (new cases per 1000 people per year)			Prevalence (cases per 1000 people)			size of age group	relative contribution of age group	Relative incidence	Relative prevalence
central estimate	Reference level for ERR	Reference: EFSA guideline	Reference: Prospective exposure	Drinking water current:	Drinking water low:	Drinking water high	Overall low			Year	ICPC code (Dutch)		total	men	women	total	men	women			Year	ICPC code (Dutch)		total	men	women	total	men	women
PFOA serum concentrations, EFSA model, average age 20-81.8 (life expectancy in NL: https://www.cbs.nl/nl-nl/visualisaties/dashboard-bevolking/levensloop/verweduwen) ng/mL	2.6	2.0031	2.184	3.2858	3.1144	3.4572	0			2023	K86		5.8	5.8	5.8	146.6	133.9	159.1			2023	K86		5.8	5.8	5.8	146.6	133.9	159.1
OR	1	1	1	1.24159	1.18547	1.29485	overall high			0-4 jaar			<0.1	<0.1	<0.1	0.2	0.2	0.1			0-4 jaar			0	0	0	0.2	0.2	0.1	864000
RR	1	1	1	1.182	1.1413	1.2198	237.053			5-9 jaar			<0.1	<0.1	<0.1	0.3	0.4	0.2			5-9 jaar			0	0	0	0.3	0.4	0.2	898000
Attributable fraction	0	0	0	0.153977	0.123806	0.180194				10-14 jaar			<0.1	<0.1	<0.1	0.5	0.6	0.4			10-14 jaar			0	0	0	0.7	0.8	0.6	952000
Number of new hypertension cases per year associated with PFOA, per 10^6 people	0	0	0	992.368	797.92	1161.34				15-19 jaar			0.2	0.2	0.2	1.4	1.4	1.3			15-19 jaar			0.2	0.2	0.2	1.6	1.6	1.5	1016000
DALYs associated with PFAS in drinking water	0	0	0	119.084	95.7504	139.36				20-24 jaar			0.5	0.4	0.6	3.5	3.1	3.8			20-24 jaar			0.5	0.4	0.6	3.8	3.4	4.1	1188000	0.0835267	0.0417633	0.317401
DALYs gained from treatment				119.084	95.7504	139.36				25-29 jaar			1.2	1.1	1.4	7.7	7	8.4			25-29 jaar			1.2	1.1	1.5	8.3	7.6	9.1	1179000	0.0828939	0.0994727	0.688019
Low estimate										30-34 jaar			2.1	1.9	2.3	14.9	13	16.8			30-34 jaar			2.1	1.9	2.3	15.8	13.9	17.6	1207000	0.0848625	0.178211	1.34083
PFOA serum concentrations, EFSA model, average age 20-81.8 (life expectancy in NL: https://www.cbs.nl/nl-nl/visualisaties/dashboard-bevolking/levensloop/verweduwen) ng/mL	2.6	2.0031	2.184	3.2858	3.1144	3.4572				35-39 jaar			3.3	3.1	3.5	27.5	23.6	31.4			35-39 jaar			3.5	3.3	3.7	29.2	25.1	33.4	1138000	0.0800112	0.280039	2.33633
OR	1	1	1	1.02373	1	1.04984				40-44 jaar			5	5.1	4.9	48.6	45.6	51.5			40-44 jaar			5.4	5.5	5.2	51.5	48.5	54.3	1073000	0.0754412	0.407382	3.88522
RR	1	1	1	1.01868	1	1.03904				45-49 jaar			7.3	7.8	6.7	82.4	80.3	84.5			45-49 jaar			7.7	8.2	7.1	87.7	86.4	89.1	1053000	0.074035	0.57007	6.49287
Attributable fraction	0	0	0	0.0183416	0	0.0375689				50-54 jaar			9.7	10.3	9.2	138.3	133.8	142.8			50-54 jaar			10.4	11.1	9.9	147.9	144.9	151	1243000	0.0873937	0.908894	12.9255
Number of new hypertension cases per year associated with PFOA, per 10^6 people	0	0	0	118.21	0	242.129				55-59 jaar			10.9	11.9	10	202.3	197.8	206.8			55-59 jaar			11.7	12.8	10.7	218.2	215.9	220.4	1266000	0.0890108	1.04143	19.4221
DALYs associated with PFAS in drinking water	0	0	0	14.1852	0	29.0554				60-64 jaar			12.4	13.9	11	277.3	276.6	278.1			60-64 jaar			13.8	15.6	12.1	302.7	306.9	298.6	1201000	0.0844407	1.16528	25.5602
DALYs gained from treatment				14.1852	0	29.0554				65-69 jaar			12.4	13.1	11.8	353	351.3	354.6			65-69 jaar			14	14.8	13.2	391.7	398.2	385.3	1047000	0.0736132	1.03058	28.8343
High estimate										70-74 jaar			11.9	11	12.8	426.8	414.7	438.3			70-74 jaar			13.6	12.8	14.5	481.8	481.6	481.9	921000	0.0647543	0.880658	31.1986
PFOA serum concentrations, EFSA model, average age 20-81.8 (life expectancy in NL: https://www.cbs.nl/nl-nl/visualisaties/dashboard-bevolking/levensloop/verweduwen) ng/mL	2.6	2.0031	2.184	3.2858	3.1144	3.4572				75-79 jaar			11.7	10.6	12.8	495.6	465.4	522.9			75-79 jaar			14.1	12.9	15.4	572.9	557.4	586.9	808000	0.0568094	0.801012	32.5461
OR	1.13284	1	1	1.5431	1.44921	1.63221				80-84 jaar			9.2	8.6	9.7	544.9	490.3	588.6			80-84 jaar			11.6	11	12.1	643	602.1	675.7	487000	0.0342403	0.397188	22.0165
RR	1.10229	1	1	1.38603	1.32501	1.44199				85 jaar en ouder			8.8	7.3	9.7	596.9	511.6	645.2			85 jaar en ouder			11.5	9.8	12.5	728.5	653.4	771.1	412000	0.0289672	0.333122	21.1026
Attributable fraction	0.0927952	0	0	0.278513	0.24529	0.306512																	>20	8.13511			208.667			check sum:	1
Number of new hypertension cases per year associated with PFOA, per 10^6 people	598.057	0	0	1795	1580.87	1975.44
DALYs associated with PFAS in drinking water	71.7669	0	0	215.4	189.705	237.053				Hypertension with organ damage			Incidence (new cases per 1000 people per year)			Prevalence (cases per 1000 people)
DALYs gained from treatment				215.4	189.705	237.053				Year	ICPC code (Dutch)		total	men	women	total	men	women
										2023	K86		5.8	5.8	5.8	146.6	133.9	159.1
										0-4 jaar			<0.1	<0.1	<0.1	<0.1	<0.1	<0.1
										5-9 jaar			<0.1	<0.1	<0.1	<0.1	<0.1	<0.1
										10-14 jaar			<0.1	<0.1	<0.1	0.2	0.2	0.2
										15-19 jaar			<0.1	<0.1	<0.1	0.2	0.2	0.2
										20-24 jaar			<0.1	<0.1	<0.1	0.3	0.3	0.3
										25-29 jaar			<0.1	<0.1	0.1	0.6	0.6	0.7
										30-34 jaar			<0.1	<0.1	<0.1	0.9	0.9	0.8
										35-39 jaar			0.2	0.2	0.2	1.7	1.5	2
										40-44 jaar			0.4	0.4	0.3	2.9	2.9	2.8
										45-49 jaar			0.4	0.4	0.4	5.3	6.1	4.6
										50-54 jaar			0.7	0.8	0.7	9.6	11.1	8.2
										55-59 jaar			0.8	0.9	0.7	15.9	18.1	13.6
										60-64 jaar			1.4	1.7	1.1	25.4	30.3	20.5
										65-69 jaar			1.6	1.7	1.4	38.7	46.9	30.7
										70-74 jaar			1.7	1.8	1.7	55	66.9	43.6
										75-79 jaar			2.4	2.3	2.6	77.3	92	64
										80-84 jaar			2.4	2.4	2.4	98.1	111.8	87.1
										85 jaar en ouder			2.7	2.5	2.8	131.6	141.8	125.9

## Sheet: AbrahamEtAlDiseases
Total DALYs in the NL in 2022 ( + 95 % conf.)		Source:	https://www.rivm.nl/publicaties/rvp-2023
	Best estimate	Low end	High end
Invasive H. influenzae type b	420	392	448	Only type b, see note b) under Table 4.2 in source publication
Tetanus	2	2	2
Diphteria	11	9	13
Total	433	403	463
Total per 10^6 people	24.716	23.0036	26.4284	Based on 2022 total population:	17519000	source:	https://www.cbs.nl/nl-nl/visualisaties/dashboard-bevolking/bevolkingspiramide
Related to drinking water:	4.9432	4.60072	5.28569
Related to PFAS:	0	0	5.28569	0 % of infections due to lower immune response because of PFAS exposure, versus 100 % of infections due to lower immune response because of PFAS exposure

## Sheet: Age distribution NL 2024
Leeftijd	Mannen	Vrouwen				Men	Women	Total
105 jaar of ouder					Total	8926000	9027000	17953000
	0	0			>20	7017000	7206000	14223000
104 jaar	0	0			>18	7234000	7416000	14650000
103 jaar	0	0			18-49	3667000	3598000	7265000
102 jaar	0	0
101 jaar	0	1000
100 jaar	0	1000			Source:	https://www.cbs.nl/nl-nl/visualisaties/dashboard-bevolking/bevolkingspiramide
99 jaar	0	1000			accessed on	2024-11-05
98 jaar	1000	2000
97 jaar	1000	3000
96 jaar	2000	5000
95 jaar	2000	7000
94 jaar	3000	9000
93 jaar	5000	12000
92 jaar	7000	15000
91 jaar	9000	18000
90 jaar	11000	21000
89 jaar	14000	25000
88 jaar	18000	29000
87 jaar	21000	33000
86 jaar	25000	37000
85 jaar	31000	43000
84 jaar	34000	47000
83 jaar	40000	51000
82 jaar	42000	52000
81 jaar	47000	57000
80 jaar	54000	63000
79 jaar	60000	69000
78 jaar	60000	68000
77 jaar	89000	97000
76 jaar	88000	97000
75 jaar	87000	93000
74 jaar	86000	92000
73 jaar	87000	92000
72 jaar	89000	93000
71 jaar	93000	97000
70 jaar	94000	98000
69 jaar	97000	101000
68 jaar	99000	103000
67 jaar	104000	106000
66 jaar	106000	109000
65 jaar	110000	112000
64 jaar	114000	116000
63 jaar	116000	118000
62 jaar	120000	121000
61 jaar	122000	123000
60 jaar	126000	125000
59 jaar	129000	128000
58 jaar	127000	126000
57 jaar	126000	125000
56 jaar	126000	125000
55 jaar	127000	127000
54 jaar	133000	133000
53 jaar	130000	131000
52 jaar	125000	126000
51 jaar	119000	122000
50 jaar	111000	113000
49 jaar	108000	110000
48 jaar	104000	105000
47 jaar	104000	104000
46 jaar	103000	104000
45 jaar	105000	106000
44 jaar	105000	106000
43 jaar	109000	109000
42 jaar	108000	109000
41 jaar	107000	106000
40 jaar	107000	107000
39 jaar	111000	109000
38 jaar	113000	111000
37 jaar	116000	114000
36 jaar	117000	114000
35 jaar	118000	115000
34 jaar	120000	116000
33 jaar	125000	120000
32 jaar	124000	120000
31 jaar	123000	119000
30 jaar	122000	118000
29 jaar	123000	118000
28 jaar	119000	115000
27 jaar	119000	114000
26 jaar	118000	115000
25 jaar	121000	117000
24 jaar	121000	117000
23 jaar	123000	120000
22 jaar	120000	117000
21 jaar	119000	117000
20 jaar	118000	116000
19 jaar	112000	109000
18 jaar	105000	101000
17 jaar	102000	96000
16 jaar	99000	95000
15 jaar	101000	96000
14 jaar	101000	96000
13 jaar	100000	96000
12 jaar	98000	93000
11 jaar	96000	91000
10 jaar	93000	88000
9 jaar	95000	90000
8 jaar	92000	88000
7 jaar	93000	88000
6 jaar	91000	86000
5 jaar	89000	86000
4 jaar	89000	85000
3 jaar	88000	84000
2 jaar	94000	89000
1 jaar	86000	83000
0 jaar	85000	81000
